# Supplementary material for: Association Mapping for 24 Traits Related to Protein Content, Gluten Strength, Color, Cooking, and Milling Quality Using Balanced and Unbalanced Data in Durum Wheat [Triticum turgidum L. var. durum (Desf).]
Source: Front Genet. 2019 Aug 16;10:717. doi: 10.3389/fgene.2019.00717 (PMC6706462; doi:10.3389/fgene.2019.00717)
Supplement: Supplementary file 1 [file Table_1.xlsx]

## Sheet: Sheet1
Suplementary Table 1 List of SNP markers belonging to Infininum 90 K assay showing polymorphism in durum wheat panel
		Genetic position based on Maccaferri et al. (2015)		Physical positions based on BLAST analysis with IWGSC Reference Sequence v1.0 assembly
Marker name	Marker ID code	Chrom.	cM (Hald.)	Chromosome	pos (bp)	id%	length (bp)	e value
CAP11_rep_c7878_143	IWB13141	1A	1.2	1A	1190655	100	96	2e-42
Tdurum_contig97729_491	IWB74011	1A	1.2	1A	1209957	99.01	101	2e-43
wsnp_Ex_c10657_17376448	IWA1376	1A	1.3	1A	1186962	99.5	201	3e-99
Excalibur_c35316_154	IWB25590	1A	1.3	1D	906988	97	100	1e-39
IAAV3919	IWB34801	1A	1.3	1A	1337256	100	132	5e-62
IAAV5306	IWB35002	1A	1.3	1A	1339628	99.35	153	3e-72
RAC875_c195_499	IWB54840	1A	1.3	7B	64478331	98.02	101	7e-42
Tdurum_contig44888_837	IWB71565	1A	1.3	1A	1337387	100	82	1e-34
tplb0028p02_562	IWB74344	1A	1.3	1A	1208304	99.01	101	2e-43
RAC875_rep_c110533_92	IWB61980	1A	1.5	1A	1339580	100	101	3e-45
wsnp_Ra_c11211_18227610	IWA7559	1A	1.7	1A	1343511	99.5	201	3e-99
BobWhite_c31470_532	IWB2454	1A	1.7	1A	2919170	99.01	101	2e-43
Excalibur_c9509_1180	IWB29495	1A	1.7	1A	1337044	99.01	101	2e-43
Excalibur_rep_c70751_58	IWB31154	1A	1.7	1D	2221225	100	71	2e-28
RAC875_c42700_264	IWB57868	1A	1.7	1A	1235802	99.01	101	2e-43
BS00009423_51	IWB6058	1A	1.7	Un	39297	99.01	101	2e-43
RAC875_c95364_259	IWB61124	1A	1.7	1A	1234446	99.01	101	2e-43
BS00010488_51	IWB6234	1A	1.7	Un	38996	99.01	101	2e-43
Tdurum_contig59794_640	IWB72690	1A	1.7	Un	150795882	100	101	3e-45
BS00064205_51	IWB9223	1A	1.7	Un	38683	98.02	101	7e-42
BS00071289_51	IWB10536	1A	1.8	1B	1972042	99.01	101	2e-43
BS00064204_51	IWB9222	1A	1.8	Un	38699	99.01	101	2e-43
Excalibur_c15165_367	IWB22569	1A	2.6	1A	3256149	100	101	3e-45
RFL_Contig3481_1669	IWB64368	1A	2.6	1D	548762	99.01	101	2e-43
tplb0025b13_1721	IWB74214	1A	2.6	1A	3388684	98.02	101	3e-41
wsnp_Ku_c1818_3557408	IWA6644	1A	2.8	1A	3390351	99.5	201	3e-99
tplb0025b13_150	IWB74213	1A	2.8	1A	3391866	100	86	8e-37
BS00023130_51	IWB7436	1A	4.1	1A	5024184	100	101	3e-45
wsnp_Ra_c744_1535534	IWA8063	1A	4.4	3A	574343817	98.68	76	8e-30
Tdurum_contig43475_155	IWB71424	1A	4.4	3A	574344119	99.01	101	2e-43
Tdurum_contig43475_978	IWB71425	1A	4.4	3A	574340988	100	100	1e-44
IACX2941	IWB35885	1A	4.6	1B	5159467	98.84	86	4e-35
wsnp_Ex_c2868_5293485	IWA3182	1A	5.1	1A	7184721	99.5	201	1e-98
BS00056550_51	IWB8696	1A	5.2	1A	7294564	98.02	101	7e-42
wsnp_Ex_rep_c106111_90308719	IWA5150	1A	6.6	1A	8240151	98.8	83	4e-33
D_GA8KES402HR8TV_187	IWB17894	1A	6.6	1D	6336763	98.84	172	2e-80
Excalibur_c71158_54	IWB28577	1A	6.6	1A	8296898	99.01	101	2e-43
BS00023201_51	IWB7470	1A	6.7	1A	7643102	100	101	3e-45
Kukri_c32052_171	IWB44057	1A	8.6	Un	276779660	97.03	101	3e-40
Excalibur_c9676_163	IWB29562	1A	9.8	1D	7510194	100	101	3e-45
Kukri_c46939_83	IWB45715	1A	9.9	1A	9579833	99.01	101	2e-43
Tdurum_contig68827_118	IWB73128	1A	9.9	1A	9579696	97.03	101	3e-40
Tdurum_contig68827_61	IWB73129	1A	9.9	1A	9579639	95.05	101	8e-37
BS00022943_51	IWB7333	1A	9.9	1A	9579739	97.03	101	3e-40
BS00003595_51	IWB5842	1A	10.6	1A	9979743	100	101	3e-45
CAP11_c2581_302	IWB12795	1A	10.8	1A	10069786	99.01	101	2e-43
Excalibur_c97691_225	IWB29601	1A	10.8	1A	10127734	97.98	99	3e-40
Kukri_c1977_1940	IWB42196	1A	10.8	1D	8605882	99.01	101	2e-43
BS00010039_51	IWB6155	1A	10.8	1D	8605822	100	101	3e-45
Tdurum_contig43943_56	IWB71462	1A	10.8	1A	10068982	99.01	101	2e-43
Tdurum_contig46413_680	IWB71687	1A	10.8	1D	8605782	98.02	101	7e-42
Tdurum_contig46413_779	IWB71688	1A	10.8	1D	8605881	95.05	101	8e-37
Tdurum_contig26035_231	IWB69234	1A	13.1	1A	11571773	98.98	98	7e-42
RAC875_c22821_542	IWB55413	1A	14.1	1A	12004014	100	101	3e-45
BobWhite_c6558_234	IWB4186	1A	14.5	1A	12098798	100	101	3e-45
wsnp_Ex_c7965_13520238	IWA4754	1A	15.8	1A	12369332	99	201	5e-97
BS00103478_51	IWB12206	1A	15.8	1A	12369482	99.01	101	2e-43
Ex_c28368_426	IWB20402	1A	15.8	1A	12313303	100	101	3e-45
Ex_c4876_1221	IWB20818	1A	15.8	1A	12305388	99.01	101	2e-43
Tdurum_contig42479_1624	IWB71172	1A	16.2	1A	12504596	99.01	101	2e-43
wsnp_Ex_c1137_2182795	IWA1479	1A	16.5	1A	12505477	99.5	201	1e-98
Ku_c4823_673	IWB39517	1A	16.5	1A	12411432	98.02	101	7e-42
Tdurum_contig42479_1254	IWB71171	1A	16.5	1A	12504226	100	101	3e-45
BS00081680_51	IWB11202	1A	16.7	1A	13767994	100	101	3e-45
Excalibur_c22240_938	IWB23779	1A	16.7	1B	15878212	98.02	101	7e-42
Kukri_c37592_531	IWB44709	1A	16.7	1D	10837178	99.01	101	2e-43
wsnp_BF200531A_Ta_2_1	IWA414	1A	18.4	1A	16434575	100	121	3e-56
Tdurum_contig83113_134	IWB73615	1A	18.4	1A	14056115	100	101	3e-45
Tdurum_contig75476_721	IWB73272	1A	19.2	1A	13980097	100	101	3e-45
D_GDEEGVY02H7D8K_299	IWB19101	1A	19.5	1D	13313255	99.2	251	3e-124
IAAV6899	IWB35266	1A	19.5	1D	12314107	100	100	3e-44
RAC875_c108229_54	IWB53183	1A	19.5	1D	12314473	98.02	101	7e-42
CAP7_c1645_359	IWB13840	1A	19.6	1A	14521488	100	101	3e-45
Tdurum_contig50845_215	IWB72127	1A	19.6	1A	14163050	96.97	99	4e-39
Tdurum_contig50845_82	IWB72128	1A	19.6	1A	14163185	99.01	101	2e-43
Tdurum_contig52332_94	IWB72258	1A	19.6	1A	14143682	100	101	3e-45
BS00022977_51	IWB7351	1A	19.6	1A	14162952	99.01	101	2e-43
BS00026453_51	IWB7627	1A	19.6	1A	14254026	99.01	101	2e-43
Tdurum_contig61492_458	IWB72793	1A	19.7	1A	15438623	99.01	101	2e-43
Tdurum_contig61492_684	IWB72794	1A	19.7	1A	15438849	99.01	101	2e-43
RAC875_c54245_88	IWB59016	1A	19.8	1A	15438723	99.01	101	2e-43
BS00022443_51	IWB7089	1A	19.8	1A	14077753	100	101	3e-45
Tdurum_contig11756_458	IWB67283	1A	20.2	1A	20094515	98.02	101	7e-42
BS00070798_51	IWB10500	1A	20.7	2A	32153618	99.01	101	2e-43
RAC875_c13012_1598	IWB53645	1A	20.7	1A	22289680	100	101	3e-45
RAC875_c2654_1817	IWB55944	1A	20.7	1A	21043110	100	92	3e-40
BS00039749_51	IWB8188	1A	20.7	1A	20889691	99.01	101	2e-43
Ra_c39042_935	IWB51995	1A	20.9	7B	12533702	100	94	3e-41
Tdurum_contig8382_300	IWB73652	1A	29.5	1A	29611971	100	101	3e-45
wsnp_BE586140A_Ta_2_1	IWA360	1A	31.4	1A	31780928	99.17	121	2e-54
BS00026917_51	IWB7640	1A	31.4	1A	126544677	100	99	4e-44
wsnp_Ex_c31983_40709866	IWA3374	1A	31.9	1A	32893090	99.5	201	1e-98
Tdurum_contig56382_747	IWB72507	1A	31.9	1A	36278848	99.01	101	2e-43
Kukri_rep_c72587_123	IWB50206	1A	36.7	1D	42141897	97.03	101	3e-40
RFL_Contig5090_1510	IWB64888	1A	36.7	1D	41720718	100	101	3e-45
BS00012210_51	IWB6538	1A	36.7	1A	41710322	98.85	87	3e-35
BobWhite_c7352_218	IWB4326	1A	37.1	1A	47791715	100	101	3e-45
Tdurum_contig622_285	IWB72875	1A	37.1	3D	576612464	99.01	101	2e-43
Tdurum_contig76915_88	IWB73401	1A	37.1	1A	42509891	100	101	3e-45
Tdurum_contig5008_635	IWB72042	1A	37.8	1A	47791220	100	101	3e-45
Tdurum_contig69753_513	IWB73155	1A	38	1A	47822851	99.01	101	2e-43
BobWhite_c4646_119	IWB3515	1A	40.7	1A	49153534	99.01	101	4e-44
Ex_c68770_506	IWB21167	1A	43.3	1A	58174752	98.59	71	8e-27
wsnp_Ex_c2181_4089639	IWA2655	1A	44.3	1A	64596941	100	146	8e-70
IAAV3306	IWB34698	1A	45.3	1A	91048399	99.5	201	1e-98
BobWhite_c31155_350	IWB2429	1A	46.8	1A	292078391	99.01	101	2e-43
Kukri_c6106_470	IWB46905	1A	46.8	1A	291255179	98.99	99	2e-42
Ra_c2322_174	IWB51523	1A	46.8	1A	301857664	99.01	101	2e-43
wsnp_Ex_c2178_4086161	IWA2651	1A	47.8	1A	305003239	98.94	189	6e-91
RAC875_c41581_176	IWB57739	1A	47.8	1A	305003377	98.02	101	7e-42
Tdurum_contig43360_1381	IWB71415	1A	47.8	1A	301197748	99.01	101	2e-43
Tdurum_contig45671_799	IWB71632	1A	47.8	1A	313748494	99.01	101	2e-43
BS00072686_51	IWB10619	1A	48.1	1A	313161446	99.01	101	2e-43
RAC875_c6338_1887	IWB59768	1A	49.7	1D	277357644	100	101	3e-45
wsnp_Ex_c9979_16421462	IWA4995	1A	49.8	1A	347640588	99.5	201	1e-98
IACX2325	IWB35853	1A	49.9	1A	356474628	99.17	120	6e-54
CAP8_rep_c7560_159	IWB15064	1A	50.1	1B	388011641	98.02	101	2e-42
RAC875_c38417_246	IWB57405	1A	50.1	1A	358761757	100	101	3e-45
wsnp_Ex_rep_c101746_87053634	IWA5031	1A	50.4	1D	292081535	100	86	2e-36
Excalibur_c49588_76	IWB27064	1A	50.4	1A	368197783	97.14	70	5e-24
Tdurum_contig62552_256	IWB72896	1A	51.1	1A	370097458	100	101	3e-45
wsnp_Ex_c4605_8240189	IWA3956	1A	51.3	1A	370106627	99.08	109	1e-47
Tdurum_contig50221_210	IWB72053	1A	58.4	1A	434426050	98.02	101	7e-42
IAAV4099	IWB34823	1A	60.7	1A	456940644	100	201	2e-100
Kukri_c22434_513	IWB42650	1A	61.2	1A	462434454	99	100	6e-43
Ra_c2895_591	IWB51724	1A	61.2	1A	462435832	100	101	3e-45
RAC875_c86680_391	IWB60861	1A	62.8	1A	464810398	99.01	101	4e-44
wsnp_Ex_c25734_34995416	IWA2995	1A	67.7	1A	472168930	100	201	2e-100
IAAV213	IWB34506	1A	67.7	1A	472143402	98.36	183	2e-85
Ra_c58315_265	IWB52305	1A	67.8	1A	473637106	98.02	101	7e-42
RAC875_c41275_131	IWB57702	1A	67.8	1D	374373384	100	101	3e-45
wsnp_Ex_c16592_25117132	IWA2152	1A	68.9	1A	477048417	100	201	2e-100
IAAV1225	IWB34341	1A	68.9	1A	477046569	100	201	2e-100
Kukri_c10239_2186	IWB40291	1A	69.2	1A	477654721	100	101	3e-45
BS00067421_51	IWB10043	1A	70.7	1A	480755700	99.01	101	6e-43
BS00022698_51	IWB7216	1A	70.7	1A	482329631	99.01	101	2e-43
BS00023101_51	IWB7423	1A	70.7	1A	480831050	100	101	3e-45
BS00040968_51	IWB8255	1A	70.7	1A	480755333	100	101	3e-45
wsnp_Ex_c5192_9203682	IWA4117	1A	71.3	1A	485002482	99	201	1e-97
BS00073585_51	IWB10679	1A	71.3	1A	485228982	99.01	101	2e-43
Ex_c5192_943	IWB20856	1A	71.3	1A	485002381	100	98	2e-43
BobWhite_rep_c63278_349	IWB5360	1A	71.3	1D	386164160	99.01	101	2e-43
RFL_Contig3203_1971	IWB64265	1A	71.3	1A	482966613	100	101	3e-45
wsnp_BE495786A_Ta_2_1	IWA268	1A	71.6	1A	481651845	99.17	121	2e-54
BS00021714_51	IWB6733	1A	72.2	1A	490087945	99.01	101	2e-43
wsnp_Ex_rep_c68857_67737959	IWA5568	1A	72.7	1A	494446764	100	120	2e-55
BS00089894_51	IWB11628	1A	76.9	1A	497522725	100	101	3e-45
wsnp_Ex_c55986_58282517	IWA4283	1A	77.1	1A	497520528	99.42	173	1e-83
Excalibur_c52495_89	IWB27324	1A	77.5	1A	498172724	100	101	3e-45
wsnp_Ku_c21316_31053745	IWA6707	1A	77.7	1A	498141636	99	201	1e-97
wsnp_Ku_c21316_31053776	IWA6708	1A	77.7	1A	498141667	99	201	4e-98
CAP12_c1906_217	IWB13258	1A	78	1D	403235899	99.01	101	4e-44
Kukri_c30322_414	IWB43838	1A	78	1A	498536645	99.01	101	2e-43
RAC875_rep_c112044_340	IWB62117	1A	78	1A	498811309	99.01	101	2e-43
BS00094553_51	IWB11883	1A	79.2	1A	500979277	100	85	3e-36
wsnp_Ku_c15214_23756800	IWA6553	1A	79.9	1A	503312313	99.5	201	1e-98
Tdurum_contig50499_858	IWB72080	1A	79.9	1B	547968795	100	101	3e-45
wsnp_Ex_c3475_6362087	IWA3496	1A	81.6	1A	506855496	99	201	1e-97
CAP7_c1083_283	IWB13718	1A	81.6	1A	506854536	98.02	101	7e-42
IAAV332	IWB34701	1A	81.6	1A	506854410	99.5	201	1e-98
Kukri_c12758_617	IWB40889	1A	81.6	1D	410506909	99.01	101	2e-43
Kukri_c29121_226	IWB43647	1A	81.6	1D	410466326	99.01	101	2e-43
Kukri_c53935_265	IWB46385	1A	81.6	1A	506546745	99.01	101	2e-43
Kukri_rep_c105589_73	IWB49095	1A	81.6	1A	506547620	100	101	3e-45
wsnp_BM140362A_Ta_2_2	IWA605	1A	82	1A	507080099	98.31	118	9e-52
wsnp_Ku_c1642_3232242	IWA6595	1A	82	1A	507079382	100	201	2e-100
Tdurum_contig45301_1322	IWB71595	1A	84.7	1D	415417231	95	80	8e-27
Kukri_c1313_1158	IWB40975	1A	84.9	1A	513661810	99.01	101	2e-43
Ku_c1313_1673	IWB38369	1A	85.1	1A	513662325	99.01	101	2e-43
Ku_c10813_1122	IWB38172	1A	85.5	1D	416621815	99.01	101	2e-43
Ra_c64515_242	IWB52379	1A	85.5	1A	513893962	100	101	3e-45
wsnp_Ex_c1997_3756118	IWA2485	1A	85.6	1A	514137647	98.08	156	6e-71
wsnp_Ex_c1997_3757721	IWA2491	1A	85.6	1A	514135923	100	185	2e-91
wsnp_JD_c6544_7697235	IWA6144	1A	85.6	1A	514138503	99	201	1e-97
wsnp_JD_c6544_7697412	IWA6145	1A	85.6	1A	514138326	99	201	1e-97
wsnp_JD_c6544_7697578	IWA6146	1A	85.6	1A	514138160	99.5	201	3e-99
Kukri_rep_c109473_80	IWB49402	1A	85.6	1A	514138353	100	101	3e-45
RAC875_c80876_67	IWB60627	1A	85.6	1A	515553315	99.01	101	2e-43
wsnp_Ku_c23012_32893918	IWA6729	1A	86.7	1A	516373127	100	201	2e-100
CAP12_c1979_117	IWB13265	1A	86.7	1A	516378248	100	101	3e-45
Tdurum_contig57101_1616	IWB72551	1A	86.7	1B	565335030	99.01	101	2e-43
Excalibur_c1845_718	IWB23141	1A	88.8	1A	517488795	100	101	3e-45
Kukri_c28695_269	IWB43588	1A	89	1A	517487644	100	101	3e-45
RAC875_c12993_127	IWB53632	1A	89	1A	517488132	99.01	101	2e-43
RAC875_c12993_201	IWB53633	1A	89	1A	517488058	99.01	101	2e-43
RAC875_c45115_340	IWB58118	1A	89	1A	517489210	98.9	91	6e-38
RAC875_c45115_509	IWB58119	1A	89	1A	517489531	99.01	101	2e-43
Excalibur_c5033_587	IWB27132	1A	90.8	1D	423857526	98.02	101	7e-42
BobWhite_c12977_65	IWB439	1A	91.7	1A	520579715	99.01	101	2e-43
Excalibur_c49946_169	IWB27098	1A	93.5	1A	521277179	98	100	3e-41
wsnp_Ku_c5210_9289260	IWA7144	1A	94.7	1A	527951967	99	201	1e-97
wsnp_Ku_c5210_9290700	IWA7145	1A	94.7	1A	527955283	99.5	200	4e-98
BS00039377_51	IWB8166	1A	94.7	1A	522501076	97.98	99	1e-40
BS00039378_51	IWB8167	1A	94.7	1A	522501043	99.01	101	2e-43
wsnp_Ku_c17322_26392311	IWA6624	1A	94.9	1A	528668997	100	99	1e-43
BS00062876_51	IWB8943	1A	94.9	1A	529788878	100	101	3e-45
CAP7_c1891_230	IWB13864	1A	95.2	1A	530177219	99.01	101	2e-43
wsnp_BG263358A_Ta_2_3	IWA531	1A	96.4	1A	531643156	96.69	121	1e-50
CAP8_c2578_452	IWB14633	1A	96.4	1B	585073580	97.59	83	6e-32
BobWhite_c15152_341	IWB751	1A	96.4	1B	589061442	99.01	101	2e-43
wsnp_Ra_c15564_23999084	IWA7639	1A	96.9	1A	531052027	100	201	2e-100
Excalibur_c7370_179	IWB28682	1A	96.9	1A	531051877	100	101	3e-45
Tdurum_contig44112_1850	IWB71487	1A	96.9	1A	532248125	97.94	97	1e-39
wsnp_Ex_c6563_11378632	IWA4537	1A	97.3	1A	533447786	99	201	1e-97
BobWhite_c13039_184	IWB444	1A	97.3	1D	435750114	99.01	101	2e-43
Tdurum_contig57566_1653	IWB72586	1A	97.3	1A	533732476	98.02	101	7e-42
Tdurum_contig57566_1755	IWB72587	1A	97.3	1A	533732374	97.03	101	3e-40
BS00028146_51	IWB7676	1A	97.3	1A	533445222	99.01	101	2e-43
BS00012042_51	IWB6517	1A	97.5	1A	534242494	99.01	101	2e-43
BS00110130_51	IWB12479	1A	98.2	1A	535027855	100	101	3e-45
BS00022239_51	IWB6984	1A	98.2	1A	535027875	100	101	3e-45
BS00081002_51	IWB11161	1A	98.4	1A	535434824	99.01	101	2e-43
BS00109991_51	IWB12454	1A	99.8	1A	536439240	99.01	101	2e-43
BS00110627_51	IWB12579	1A	99.8	1A	536439392	100	101	3e-45
BS00022261_51	IWB6995	1A	99.8	1A	536439340	99.01	101	2e-43
BS00022848_51	IWB7289	1A	99.9	1A	536665425	100	101	3e-45
wsnp_Ra_c22110_31550370	IWA7754	1A	102.2	1A	537538170	99.5	201	1e-98
CAP8_c4643_61	IWB14754	1A	102.2	1A	537543058	99.01	101	2e-43
RAC875_c56690_320	IWB59223	1A	102.2	1A	536958715	99.01	101	2e-43
BobWhite_c23632_322	IWB1728	1A	102.7	1D	443824680	98.67	75	5e-29
Excalibur_c97157_137	IWB29579	1A	102.7	1D	443747081	100	101	3e-45
Excalibur_c97157_65	IWB29580	1A	102.7	1A	539702794	99.01	101	2e-43
Tdurum_contig21114_255	IWB68917	1A	102.8	1A	539899967	100	101	3e-45
wsnp_JD_c3973_5044238	IWA6042	1A	103.2	1A	540144011	100	201	2e-100
IAAV544	IWB35025	1A	103.2	1A	540143811	100	191	8e-95
wsnp_Ex_rep_c102067_87314043	IWA5047	1A	104.3	1A	541468867	99	201	1e-97
BS00085366_51	IWB11406	1A	104.3	1B	608533436	99.02	102	2e-43
RAC875_c12348_720	IWB53529	1A	104.3	1A	541632776	99.01	101	2e-43
wsnp_BE443588A_Ta_2_2	IWA136	1A	104.4	1A	542136675	99.17	121	4e-55
wsnp_BE443588A_Ta_2_1	IWA135	1A	104.5	1A	542136582	100	121	3e-56
wsnp_Ex_c4612_8254533	IWA3962	1A	104.6	1A	542438110	99.46	184	3e-89
BobWhite_c41272_159	IWB3160	1A	104.6	1A	542825389	99.01	101	2e-43
Tdurum_contig96086_74	IWB73951	1A	104.6	1A	542825359	98.02	101	7e-42
BS00095510_51	IWB11932	1A	104.9	1A	543961391	100	101	3e-45
BS00078085_51	IWB10986	1A	105.1	1A	544055625	100	101	3e-45
RAC875_c67771_805	IWB60125	1A	105.3	1D	448656285	99.01	101	2e-43
RAC875_c32379_216	IWB56724	1A	105.5	1A	544160290	98.02	101	7e-42
BS00023203_51	IWB7472	1A	105.5	1A	544378341	100	101	3e-45
tplb0059d21_1032	IWB75206	1A	105.7	1A	544374305	98.78	82	6e-33
Tdurum_contig15967_90	IWB68479	1A	106.2	1A	545530609	100	101	3e-45
wsnp_JD_c13024_13129681	IWA5822	1A	107	1A	546036975	99	201	1e-97
IAAV3650	IWB34750	1A	107	1A	546036376	99.5	201	1e-98
JD_c13024_360	IWB36967	1A	107	1A	546037054	99.01	101	2e-43
Tdurum_contig75762_377	IWB73305	1A	107	1A	546037154	99.01	101	2e-43
Tdurum_contig75762_406	IWB73306	1A	107	1A	546037125	98.02	101	7e-42
wsnp_BE494527A_Ta_2_1	IWA254	1A	107.1	1A	547299571	100	121	3e-56
Ra_c29200_300	IWB51733	1A	107.1	1A	546044433	99.01	101	2e-43
Kukri_c55266_242	IWB46495	1A	107.2	1A	546520018	99.01	101	2e-43
Tdurum_contig5711_174	IWB72556	1A	107.2	1A	546520179	100	101	3e-45
Tdurum_contig5711_242	IWB72557	1A	107.2	1A	546520111	99.01	101	2e-43
wsnp_JD_c4904_6034093	IWA6081	1A	107.3	1A	547298720	98.01	201	3e-94
IAAV3156	IWB34672	1A	107.3	1A	547299443	99.06	106	6e-46
IACX1240	IWB35726	1A	107.3	1B	622467115	99.08	109	6e-48
wsnp_Ex_rep_c66919_65342127	IWA5333	1A	107.4	1A	547311899	98.51	201	2e-95
wsnp_Ex_rep_c81556_76277906	IWA5754	1A	107.4	1A	547316901	99.23	130	3e-59
RAC875_c16136_129	IWB54223	1A	107.4	1A	547311749	98.02	101	7e-42
Tdurum_contig34826_234	IWB70514	1A	107.5	1A	547384316	99.01	101	2e-43
wsnp_BE403322A_Ta_1_1	IWA24	1A	108.1	1A	547966448	99.17	121	2e-54
CAP12_c6629_301	IWB13506	1A	110.1	1A	564279293	99.01	101	2e-43
Excalibur_c21534_1436	IWB23648	1A	110.1	1D	457148456	100	101	3e-45
BobWhite_c37358_208	IWB2902	1A	110.1	1A	571788193	99.01	101	2e-43
BobWhite_c44164_151	IWB3350	1A	110.1	1A	572020105	98.91	92	2e-38
BobWhite_c44164_402	IWB3351	1A	110.1	1A	572020346	99.01	101	2e-43
Tdurum_contig62584_770	IWB72899	1A	110.1	1A	564279193	99.01	101	2e-43
BS00067119_51	IWB9961	1A	110.1	1A	547906932	100	101	3e-45
RFL_Contig399_1148	IWB64554	1A	110.7	1A	549420825	100	101	3e-45
RFL_Contig399_976	IWB64556	1A	110.7	1A	549420559	99.01	101	2e-43
Ra_c8027_1021	IWB52703	1A	110.9	1A	549704288	100	101	3e-45
RAC875_c49433_308	IWB58556	1A	110.9	1A	549842348	100	101	3e-45
Ra_c41164_730	IWB52033	1A	112.1	1A	551320224	97.98	99	1e-40
Ra_c5683_1762	IWB52276	1A	112.2	1A	551461746	100	101	3e-45
Ra_c5683_2584	IWB52277	1A	112.2	1A	551460924	100	101	3e-45
Tdurum_contig11106_264	IWB66930	1A	114.1	1A	554208330	99.01	101	2e-43
Tdurum_contig11106_340	IWB66931	1A	114.1	1A	554208254	98.99	99	2e-42
RAC875_c7563_273	IWB60380	1A	116	1A	556299558	99.01	101	2e-43
wsnp_CAP7_rep_c5385_2417464	IWA1118	1A	116.4	1A	558591765	99	201	1e-97
wsnp_Ex_c3264_6017750	IWA3409	1A	116.4	1A	571580252	100	201	2e-100
wsnp_Ex_c34594_42877243	IWA3486	1A	116.4	1A	558507423	96.58	117	2e-46
wsnp_Ex_c41553_48351921	IWA3783	1A	116.4	1A	570861651	100	201	2e-100
wsnp_Ra_rep_c108284_91604017	IWA8135	1A	116.4	1B	643097787	98.88	89	2e-36
BS00072408_51	IWB10613	1A	116.4	1A	558536578	100	101	3e-45
BobWhite_c6820_199	IWB4244	1A	116.4	1A	571580102	100	101	3e-45
RAC875_rep_c69152_184	IWB62537	1A	116.4	1A	558479817	100	76	3e-31
Tdurum_contig56662_54	IWB72526	1A	116.4	1A	557932839	97.06	102	3e-40
Tdurum_contig78830_348	IWB73444	1A	116.4	1A	558977946	100	101	3e-45
Tdurum_contig78830_745	IWB73445	1A	116.4	1A	558978343	99.01	101	2e-43
Tdurum_contig80278_250	IWB73464	1A	116.4	1A	558185449	99.01	101	2e-43
BS00066659_51	IWB9856	1A	116.4	1A	558540876	99.01	101	2e-43
Excalibur_c1936_1072	IWB23299	1A	120	1A	564749371	100	101	3e-45
Excalibur_c66_147	IWB28418	1A	120	1A	572350788	100	101	3e-45
Tdurum_contig47345_284	IWB71793	1A	120	1A	549420828	95	80	8e-27
Tdurum_contig51167_390	IWB72160	1A	120	1A	566010033	99.01	101	2e-43
Tdurum_contig51167_534	IWB72161	1A	120	1A	566010177	99.01	101	2e-43
Tdurum_contig51167_915	IWB72163	1A	120	1A	566010951	99.01	101	2e-43
Kukri_c24753_460	IWB43028	1A	121.1	1D	473864950	98.77	81	2e-32
wsnp_CAP11_c146_160903	IWA672	1A	121.2	1A	572351033	98.51	201	2e-95
Tdurum_contig18174_283	IWB68712	1A	121.2	1A	566484683	98.7	77	4e-30
Tdurum_contig81011_244	IWB73482	1A	121.2	1A	572350883	99.01	101	2e-43
CAP12_c8163_118	IWB13551	1A	121.3	1A	569465990	99.01	101	2e-43
Kukri_c82086_387	IWB47904	1A	121.3	1D	455802372	100	101	3e-45
wsnp_Ex_c7684_13109335	IWA4713	1A	122.7	1A	570860075	99.23	130	3e-59
CAP12_c3758_112	IWB13385	1A	122.7	1A	571789688	98.98	98	7e-42
Kukri_c2338_533	IWB42798	1A	122.7	1A	570859996	98.7	77	4e-30
BS00106641_51	IWB12293	1A	132.7	1A	577079082	98.02	101	7e-42
BS00022824_51	IWB7275	1A	132.7	1A	577474264	100	101	3e-45
BS00023114_51	IWB7430	1A	132.7	1A	577079070	97.03	101	3e-40
wsnp_Ex_c9343_15514687	IWA4898	1A	134.7	1A	577841067	100	201	2e-100
BS00068074_51	IWB10223	1A	137.7	1A	579198682	99.01	101	2e-43
RAC875_c11016_495	IWB53222	1A	138.5	1A	579830464	100	101	3e-45
BS00011521_51	IWB6426	1A	138.5	1A	579830542	99.01	101	2e-43
wsnp_Ex_c271_521429	IWA3089	1A	142.1	1A	580422354	99.5	201	1e-98
Kukri_c310_1953	IWB43929	1A	142.1	1A	580424801	100	101	3e-45
wsnp_Ex_c11939_19147790	IWA1560	1A	142.6	1A	581585780	99.5	201	1e-98
wsnp_Ex_c1557_2973321	IWA2035	1A	142.6	1A	581830690	99.21	127	4e-58
BS00107935_51	IWB12340	1A	142.6	1A	581829047	99.01	101	2e-43
Ku_c20664_262	IWB38744	1A	142.6	1D	483939059	100	101	3e-45
RAC875_c1295_1603	IWB53622	1A	142.6	1A	581829005	99.01	101	2e-43
RAC875_c62550_470	IWB59699	1A	143.7	1A	583894934	99.01	101	2e-43
CAP12_rep_c5332_341	IWB13624	1A	144.6	1A	584509620	99.01	101	2e-43
IAAV618	IWB35161	1A	145.6	1D	486879028	100	201	2e-100
Tdurum_contig893_53	IWB73748	1A	145.6	1B	676711536	100	101	3e-45
BS00070991_51	IWB10518	1A	146.1	1A	586913922	100	101	3e-45
BS00075271_51	IWB10791	1A	146.1	1A	586914400	100	101	3e-45
BobWhite_c1027_1127	IWB38	1A	146.1	1A	586993822	99.01	101	2e-43
Kukri_c4204_1346	IWB45182	1A	146.3	Un	2223477	100	74	4e-30
BS00035273_51	IWB8006	1A	146.3	1A	587360629	100	95	7e-42
BS00064087_51	IWB9191	1A	146.8	Un	2218467	99.01	101	2e-43
IAAV8446	IWB35476	1A	147.2	1A	587839940	99.5	201	1e-98
IAAV4435	IWB34872	1A	147.6	1A	588906538	100	93	2e-40
RAC875_c26801_179	IWB55986	1A	147.7	1B	683471705	100	101	3e-45
BS00067741_51	IWB10132	1A	148.3	1A	590003201	99.01	101	2e-43
Excalibur_c1255_293	IWB22117	1A	148.3	1A	590002791	100	101	3e-45
wsnp_Ex_c1255_2411550	IWA1644	1A	148.9	1A	590001505	99.32	146	1e-67
Kukri_c43479_207	IWB45352	1A	148.9	1A	590343100	100	101	3e-45
wsnp_Ex_c52086_55808126	IWA4120	1A	149.5	1B	685274524	100	147	2e-70
BS00096930_51	IWB11979	1A	149.5	1A	591147367	99.01	101	2e-43
CAP11_c1115_150	IWB12664	1A	149.5	1A	591153715	100	101	3e-45
Kukri_c34242_404	IWB44295	1A	149.5	1D	492614988	100	94	3e-41
RAC875_c85550_52	IWB60808	1A	149.5	1A	591147431	98.02	101	7e-42
RFL_Contig858_2219	IWB65294	1A	149.5	1A	591147683	100	101	3e-45
CAP11_c5573_163	IWB12954	1A	149.7	1A	591611389	99.01	101	2e-43
wsnp_Ex_c750_1474300	IWA4693	1A	149.9	1B	686843834	99	201	1e-97
BobWhite_c17416_426	IWB1038	1A	149.9	5D	6107025	99.01	101	2e-43
wsnp_Ex_c2918_5381441	IWA3215	1A	150.2	1A	593301501	99.5	201	1e-98
wsnp_Ex_rep_c72011_70562321	IWA5734	1A	150.2	1A	593399203	100	79	1e-32
wsnp_JD_c12333_12595897	IWA5806	1A	150.2	1A	593398726	96.74	92	2e-35
Excalibur_c17004_1396	IWB22896	1A	150.2	1D	495230294	99.01	101	2e-43
Excalibur_rep_c71271_247	IWB31181	1A	150.2	1A	593301487	100	101	3e-45
Tdurum_contig47006_1105	IWB71743	1A	150.2	1A	593549077	100	101	3e-45
Tdurum_contig47006_2711	IWB71745	1A	150.2	1A	593550635	99.01	101	2e-43
Tdurum_contig5560_193	IWB72461	1A	150.2	1A	593287138	100	101	3e-45
tplb0059i08_441	IWB75215	1A	150.2	1A	593549164	100	88	6e-38
Kukri_c18608_729	IWB41993	1A	150.3	1A	593398953	100	72	5e-29
BS00076192_51	IWB10856	1B	-1.6	1B	1779897	100	101	3e-45
Excalibur_c35316_388	IWB25591	1B	-1.6	1B	3658136	99.01	101	2e-43
tplb0025b13_2792	IWB74219	1B	0.3	1D	578030	100	70	6e-28
Tdurum_contig8791_415	IWB73733	1B	3	1B	8255118	100	101	3e-45
BS00023084_51	IWB7419	1B	3	1B	7479145	100	101	3e-45
CAP8_c2499_173	IWB14623	1B	3.9	1A	8251122	100	101	3e-45
BS00023102_51	IWB7424	1B	3.9	1B	9069664	99.01	101	2e-43
Kukri_c7393_851	IWB47572	1B	6	1B	13244254	99.01	101	2e-43
BS00068429_51	IWB10312	1B	6.1	1B	10367363	99.01	101	2e-43
BS00081729_51	IWB11208	1B	6.1	1B	10081613	99.01	101	2e-43
BS00103677_51	IWB12208	1B	6.1	1B	10359581	100	101	3e-45
Kukri_c14149_462	IWB41164	1B	6.1	1D	8625564	98.02	101	7e-42
RAC875_c75971_349	IWB60396	1B	6.1	1A	10055434	97.03	101	3e-40
BS00022564_51	IWB7156	1B	6.1	1B	11182251	99.01	101	2e-43
BS00072113_51	IWB10589	1B	7.9	1B	12815820	99.01	101	2e-43
Tdurum_contig58525_304	IWB72623	1B	7.9	1B	14152765	99.01	101	2e-43
Tdurum_contig50555_1144	IWB72083	1B	8.3	1B	14844288	98.98	98	7e-42
Tdurum_contig44219_165	IWB71508	1B	8.5	1B	15169335	99.01	101	2e-43
Tdurum_contig76266_221	IWB73359	1B	8.5	1B	15166232	100	101	3e-45
Kukri_rep_c113971_162	IWB49628	1B	9.7	1D	11454440	98.02	101	7e-42
Tdurum_contig75546_247	IWB73278	1B	12.8	1B	17691759	99.01	101	2e-43
Tdurum_contig50667_299	IWB72106	1B	14.3	1B	20588113	98.02	101	7e-42
Tdurum_contig78972_316	IWB73447	1B	14.3	1B	18419687	98.02	101	7e-42
Tdurum_contig50667_671	IWB72109	1B	14.5	1B	20587741	98.02	101	7e-42
Tdurum_contig403_122	IWB70626	1B	15.2	1B	13280608	97.03	101	3e-40
Tdurum_contig403_290	IWB70627	1B	15.7	1B	22206040	99.01	101	2e-43
Tdurum_contig41904_446	IWB70675	1B	15.7	1B	24499247	99.01	101	2e-43
wsnp_Ex_c5780_10153638	IWA4349	1B	19.4	1B	26186042	100	201	2e-100
wsnp_Ku_c2620_4980121	IWA6787	1B	19.4	1B	26185662	100	201	2e-100
wsnp_BF473056D_Ta_2_1	IWA466	1B	20.5	1D	19127012	100	121	3e-56
wsnp_BE405834B_Ta_2_2	IWA63	1B	20.5	1B	28765457	99.17	121	2e-54
wsnp_BE405834B_Ta_2_3	IWA64	1B	20.5	1B	28765583	99.17	121	2e-54
Tdurum_contig56188_569	IWB72495	1B	20.5	1B	28563880	100	101	3e-45
Tdurum_contig29380_201	IWB69778	1B	21.7	1B	33982795	100	101	3e-45
Kukri_c267_77	IWB43331	1B	21.8	5D	516820469	99.01	101	2e-43
BS00067169_51	IWB9977	1B	21.8	1B	33066868	100	101	3e-45
Tdurum_contig12598_378	IWB67669	1B	22.8	1D	21660584	99.01	101	2e-43
Tdurum_contig12598_408	IWB67670	1B	22.8	1D	21660614	97.98	99	1e-40
Tdurum_contig42446_1915	IWB71165	1B	22.8	1D	21647474	95.05	101	8e-37
Tdurum_contig42446_1999	IWB71166	1B	22.8	1D	21647390	93.48	92	1e-29
BS00067003_51	IWB9932	1B	23.9	1B	39545480	99.01	101	2e-43
Kukri_rep_c100936_449	IWB48577	1B	25.4	1B	40199610	94.34	106	3e-36
RFL_Contig2160_617	IWB63847	1B	25.5	1B	46884361	99.01	101	2e-43
Tdurum_contig9762_314	IWB74006	1B	25.7	1B	42350954	99.01	101	2e-43
BS00059502_51	IWB8781	1B	26.1	1B	48347158	99.01	101	2e-43
Tdurum_contig17609_117	IWB68665	1B	27.2	1A	32376320	83.33	90	8e-12
Tdurum_contig26281_139	IWB69254	1B	27.4	1B	53248169	99.01	101	2e-43
Tdurum_contig28940_690	IWB69668	1B	27.4	1B	53052366	98.02	101	7e-42
Tdurum_contig82187_189	IWB73550	1B	27.4	1B	53248936	100	101	3e-45
BS00110546_51	IWB12562	1B	27.6	1B	57085503	99.01	101	2e-43
IAAV7704	IWB35375	1B	27.6	1B	56316914	100	154	3e-74
Kukri_c50086_537	IWB46047	1B	27.6	1B	59474054	99.01	101	2e-43
Tdurum_contig5501_176	IWB72419	1B	27.6	1B	53246421	99.01	101	2e-43
BS00066014_51	IWB9695	1B	28.8	1B	59514595	99.01	101	2e-43
BS00083533_51	IWB11309	1B	30.5	1B	69906151	99	100	6e-43
Kukri_c5861_360	IWB46756	1B	30.5	1B	70327879	99.01	101	2e-43
wsnp_BF291549B_Ta_1_1	IWA435	1B	33	1B	98723514	99.17	121	2e-54
BS00108806_51	IWB12387	1B	33	1B	105687142	99.01	101	2e-43
IAAV3413	IWB34711	1B	33	1B	96592415	100	201	2e-100
Ku_c58871_938	IWB39667	1B	33	1B	106683330	99.01	101	2e-43
Kukri_c24120_83	IWB42926	1B	33	1B	106765583	99.01	101	2e-43
Kukri_c6027_66	IWB46851	1B	33	1A	64693371	100	101	3e-45
Kukri_rep_c112099_98	IWB49541	1B	33	1B	106765510	99.01	101	2e-43
Ra_c71421_387	IWB52544	1B	33	1B	106792224	99.01	101	2e-43
BS00062632_51	IWB8875	1B	33	1B	104467913	99.01	101	2e-43
BS00064761_51	IWB9362	1B	33	7D	596667377	99.01	101	2e-43
BS00068779_51	IWB10361	1B	33.7	1B	130631008	99.01	101	2e-43
RAC875_c47137_112	IWB58317	1B	33.7	1B	130347841	99.01	101	2e-43
BS00022549_51	IWB7149	1B	33.7	1B	119887234	99.01	101	2e-43
BS00022648_51	IWB7193	1B	33.7	1B	115958966	99.01	101	2e-43
BS00022690_51	IWB7214	1B	33.7	1B	117188657	98.81	84	5e-34
BS00093740_51	IWB11820	1B	33.8	1B	120884101	99.01	101	2e-43
BS00068239_51	IWB10264	1B	34	Un	326041761	100	101	3e-45
Kukri_c6135_150	IWB46929	1B	34	1B	130017104	100	101	3e-45
RAC875_c51813_182	IWB58776	1B	34.3	1B	133113569	99.01	101	2e-43
BS00097433_51	IWB12000	1B	34.6	1B	156685943	100	98	2e-43
BS00065139_51	IWB9464	1B	35.1	1B	282427961	99.01	101	2e-43
BS00106581_51	IWB12288	1B	35.5	1B	166078339	99.01	101	2e-43
Tdurum_contig54548_1002	IWB72364	1B	35.5	4B	488673769	100	101	3e-45
BS00067743_51	IWB10134	1B	35.6	1B	226358029	99.01	101	2e-43
IACX8373	IWB36294	1B	35.6	1D	168484584	100	201	2e-100
BS00009921_51	IWB6137	1B	35.6	1D	168484734	100	101	3e-45
BS00042054_51	IWB8300	1B	35.6	1B	176996684	99.01	101	2e-43
BS00073373_51	IWB10660	1B	35.7	1B	282277269	99.01	101	2e-43
BS00077353_51	IWB10923	1B	35.7	1B	282277151	99.01	101	2e-43
BS00088264_51	IWB11553	1B	35.7	1B	280167325	100	101	3e-45
BS00094759_51	IWB11896	1B	35.7	1D	86218542	100	94	3e-41
CAP8_c4506_82	IWB14738	1B	35.7	1B	283904522	100	101	3e-45
IAAV3828	IWB34783	1B	35.7	1D	137437518	99.5	201	1e-98
IACX8452	IWB36303	1B	35.7	1B	278092440	100	89	4e-38
Ku_c18793_951	IWB38670	1B	35.7	1B	313276474	100	101	3e-45
Kukri_c5276_801	IWB46284	1B	35.7	2D	641603804	100	71	2e-28
Kukri_c78742_146	IWB47778	1B	35.7	1D	203319063	99.01	101	2e-43
Kukri_rep_c104432_114	IWB48992	1B	35.7	1B	275672966	100	101	3e-45
BS00022317_51	IWB7021	1B	35.7	1B	218442396	100	101	3e-45
Tdurum_contig48959_515	IWB71939	1B	35.7	5B	653433733	99.01	101	2e-43
BS00023006_51	IWB7369	1B	35.7	Un	6017815	100	101	3e-45
BS00050126_51	IWB8585	1B	35.7	1B	285345337	99	100	6e-43
BS00050457_51	IWB8588	1B	35.7	1B	288395984	100	101	3e-45
BS00062770_51	IWB8920	1B	35.7	1B	285336434	99.01	101	2e-43
Tdurum_contig31624_230	IWB70284	1B	37	1B	297728946	98.02	101	7e-42
wsnp_CAP7_c2574_1239140	IWA1068	1B	37.1	1B	301796762	98.41	189	1e-88
wsnp_BG607036B_Ta_1_1	IWA580	1B	37.1	1B	311680737	99.17	121	2e-54
wsnp_Ku_c7377_12718787	IWA7281	1B	37.1	1B	326785101	93.03	201	2e-75
Ex_c6473_575	IWB21043	1B	37.1	1B	326781621	99.01	101	2e-43
Excalibur_c15885_1145	IWB22709	1B	37.1	1B	317364792	100	101	3e-45
Excalibur_c20228_135	IWB23446	1B	37.1	1D	211619376	99.01	101	2e-43
IACX1339	IWB35740	1B	37.1	1B	314563725	100	121	3e-56
Kukri_c1329_1502	IWB41013	1B	37.1	1B	326015693	99.01	101	2e-43
Kukri_c5398_1061	IWB46388	1B	37.1	1B	326781860	99.01	101	2e-43
Ra_c7745_1253	IWB52669	1B	37.1	1B	301257759	100	99	4e-44
Ra_c7745_1437	IWB52670	1B	37.1	1B	301257572	98.02	101	7e-42
RAC875_rep_c117462_124	IWB62417	1B	37.1	1B	315530819	100	98	2e-43
Tdurum_contig11692_131	IWB67237	1B	37.1	1B	311428129	100	101	3e-45
Tdurum_contig13391_680	IWB67968	1B	37.1	1B	305269891	99.01	101	2e-43
BS00022104_51	IWB6906	1B	37.1	1B	327957989	99.01	101	2e-43
Tdurum_contig60547_129	IWB72741	1B	37.1	1B	300577047	99.01	101	2e-43
Tdurum_contig60547_330	IWB72742	1B	37.1	1B	300576846	100	101	3e-45
Tdurum_contig60809_268	IWB72756	1B	37.1	1B	308587768	100	101	3e-45
Tdurum_contig63991_280	IWB72967	1B	37.1	1B	301257586	100	101	3e-45
Tdurum_contig83763_107	IWB73650	1B	37.1	1B	317365020	99.01	101	2e-43
tplb0024i16_800	IWB74187	1B	37.1	1A	272613076	100	94	3e-41
wsnp_Ku_c7377_12718554	IWA7280	1B	37.2	#N/A	#N/A	#N/A	#N/A	#N/A
Ex_c6028_1602	IWB20988	1B	37.2	1B	322937714	99.01	101	2e-43
BS00018461_51	IWB6654	1B	37.2	1B	326782330	100	101	3e-45
BobWhite_c1456_615	IWB669	1B	37.2	1B	328642394	100	101	3e-45
Tdurum_contig45715_549	IWB71638	1B	37.2	1B	325286201	98.02	101	7e-42
tplb0029b01_123	IWB74353	1B	37.2	1B	328642065	100	101	3e-45
BS00061923_51	IWB8848	1B	37.2	1B	326924554	99.01	101	2e-43
BobWhite_c22981_218	IWB1656	1B	38.4	1B	349831141	99.01	101	2e-43
Kukri_c30982_1173	IWB43926	1B	38.4	1B	336210210	100	101	3e-45
IACX1008	IWB35618	1B	38.6	1B	342647398	100	121	3e-56
RAC875_c50514_88	IWB58654	1B	38.8	1B	339081816	100	90	4e-39
BS00022085_51	IWB6898	1B	38.8	1B	342647819	99.01	101	2e-43
BS00053348_51	IWB8626	1B	38.8	1D	235579947	100	101	3e-45
wsnp_Ex_c24700_33953160	IWA2923	1B	38.9	1B	348419366	100	201	2e-100
wsnp_JD_c8926_9848514	IWA6210	1B	38.9	1B	348419860	99.01	202	1e-97
Tdurum_contig83096_388	IWB73614	1B	39.4	1B	354917500	99.01	101	2e-43
BS00041968_51	IWB8297	1B	39.4	1B	356227963	98.59	71	8e-27
BS00022023_51	IWB6866	1B	42.2	1B	363477334	99.01	101	2e-43
Tdurum_contig51348_327	IWB72175	1B	42.2	1B	363477234	98.02	101	7e-42
BS00012079_51	IWB6526	1B	43	1B	373143793	99.01	101	2e-43
wsnp_Ku_c9014_15193623	IWA7343	1B	43.2	1B	370035179	99.5	201	1e-98
Ku_c42700_2798	IWB39421	1B	43.2	1B	371455438	99.01	101	2e-43
Kukri_c37856_123	IWB44740	1B	43.2	1B	373144020	100	101	3e-45
Kukri_c76762_166	IWB47697	1B	43.2	1B	374319295	100	101	3e-45
IACX184	IWB35800	1B	43.5	1B	388383312	100	121	3e-56
BS00029345_51	IWB7716	1B	43.5	1B	380887633	100	101	3e-45
BS00052089_51	IWB8612	1B	43.6	1B	385162623	100	101	3e-45
Ex_c25180_1615	IWB20278	1B	45.4	1B	397448591	100	101	3e-45
BS00021947_51	IWB6815	1B	47.1	1B	406043014	98.02	101	7e-42
Tdurum_contig43910_687	IWB71459	1B	47.1	1B	408666624	100	101	3e-45
Ku_c12671_120	IWB38339	1B	47.6	1B	407304812	100	84	1e-35
BS00022581_51	IWB7163	1B	47.6	1B	413985986	100	101	3e-45
BS00060270_51	IWB8804	1B	47.6	1B	412895556	100	101	3e-45
BS00071082_51	IWB10523	1B	48.7	1B	421094361	100	101	3e-45
BS00071083_51	IWB10524	1B	48.7	1B	421094166	99.01	101	2e-43
Tdurum_contig32033_334	IWB70319	1B	48.7	1B	424075914	100	101	3e-45
Tdurum_contig28530_380	IWB69550	1B	50.2	1B	429976284	98.02	101	7e-42
BS00030770_51	IWB7796	1B	50.3	1B	432823968	99.01	101	2e-43
Tdurum_contig62113_343	IWB72861	1B	50.4	1B	429005071	99.01	101	2e-43
wsnp_Ex_c8865_14815305	IWA4849	1B	50.6	1B	433431611	99	201	1e-97
Kukri_rep_c73393_848	IWB50261	1B	50.6	1A	402807507	99.01	101	2e-43
Tdurum_contig48063_1879	IWB71866	1B	50.6	1B	431455780	100	101	3e-45
BS00022133_51	IWB6921	1B	52.2	1B	443997670	99.01	101	2e-43
RAC875_rep_c74070_518	IWB63003	1B	53.2	1B	453343887	98.63	73	2e-27
Tdurum_contig68228_206	IWB73093	1B	53.9	1B	456263838	100	101	3e-45
wsnp_Ra_c2027_3943938	IWA7721	1B	54.1	1B	456977273	98.81	168	3e-79
IAAV8763	IWB35532	1B	54.5	1B	466092791	100	142	1e-67
wsnp_BE443930B_Ta_2_2	IWA141	1B	54.8	1B	465700689	100	121	3e-56
RAC875_c3617_396	IWB57166	1B	54.8	1B	469974307	99.01	101	2e-43
Tdurum_contig60052_184	IWB72708	1B	56.3	1B	473529187	100	101	3e-45
wsnp_Ex_c5388_9526777	IWA4197	1B	56.7	1B	474451105	100	201	2e-100
wsnp_Ku_c24323_34285350	IWA6758	1B	56.7	1B	474117905	100	201	2e-100
wsnp_CAP11_rep_c8576_3700031	IWA890	1B	56.7	1B	474449602	100	158	1e-76
BS00071465_51	IWB10551	1B	56.7	1D	354718065	100	101	3e-45
CAP7_c3456_113	IWB14021	1B	56.7	1B	476034886	100	101	3e-45
CAP8_c9553_109	IWB14999	1B	56.7	1B	474449452	100	101	3e-45
Tdurum_contig56873_1237	IWB72532	1B	56.7	1B	476333138	100	101	3e-45
BS00023142_51	IWB7443	1B	56.7	1B	476880056	99.01	101	2e-43
BS00067146_51	IWB9969	1B	57.5	1B	480821399	100	101	3e-45
IAAV9039	IWB35581	1B	57.6	1B	481709261	98.37	123	1e-53
wsnp_Ex_rep_c66643_64952627	IWA5278	1B	57.9	1B	484887642	100	133	8e-63
wsnp_Ku_c19618_29134473	IWA6674	1B	57.9	1B	482713348	99.09	110	4e-48
BS00081125_51	IWB11168	1B	57.9	1B	484147502	99.01	101	2e-43
Excalibur_c49906_242	IWB27095	1B	57.9	1B	484360978	98.02	101	7e-42
Excalibur_c57881_200	IWB27767	1B	57.9	1B	484361087	98.02	101	2e-42
IACX3408	IWB35922	1B	59.1	1B	489133946	95.97	124	2e-48
RAC875_c5556_328	IWB59128	1B	59.5	1B	489900948	98.77	81	2e-32
Tdurum_contig13044_268	IWB67838	1B	59.5	1B	488819486	100	101	3e-45
Ku_c20478_390	IWB38741	1B	59.8	1B	490452870	100	101	3e-45
BS00022615_51	IWB7180	1B	62.2	1B	500540888	100	101	3e-45
CAP11_c2974_53	IWB12819	1B	63.3	1B	505068617	100	78	2e-32
Tdurum_contig60509_232	IWB72738	1B	64	1B	510980625	100	101	3e-45
Tdurum_contig56276_226	IWB72498	1B	67.2	1B	513483265	100	101	3e-45
wsnp_Ku_c21356_31093507	IWA6709	1B	67.4	1A	483033425	98.51	201	2e-95
BS00022842_51	IWB7286	1B	67.4	1B	513483365	100	101	3e-45
Tdurum_contig31102_299	IWB70168	1B	70.5	1B	530478679	100	101	3e-45
CAP12_c424_402	IWB13397	1B	70.8	1B	529855076	99.01	101	2e-43
IACX11291	IWB35683	1B	70.8	1B	530959722	99.39	165	8e-79
IACX9510	IWB36392	1B	70.8	1B	530959647	99.5	201	1e-98
RAC875_c8888_802	IWB60940	1B	70.8	1D	391741583	100	101	3e-45
RAC875_s110519_303	IWB63416	1B	70.8	1D	391741610	99.01	101	2e-43
Tdurum_contig87938_342	IWB73734	1B	70.8	1B	531004818	99.01	101	2e-43
Kukri_c27693_710	IWB43477	1B	71.4	1A	494445753	100	101	3e-45
BS00010399_51	IWB6215	1B	71.4	1B	532163635	100	101	3e-45
RFL_Contig4977_2333	IWB64848	1B	72	1B	535546139	100	101	3e-45
CAP12_c1129_220	IWB13176	1B	72.5	1B	535797834	99.01	101	2e-43
BobWhite_c16280_521	IWB901	1B	72.9	1B	536772935	99.01	101	2e-43
BS00065126_51	IWB9457	1B	73.7	1B	539932294	99.01	101	2e-43
Kukri_c73734_175	IWB47566	1B	74.1	1B	540720836	99.01	101	2e-43
wsnp_Ex_c7447_12751589	IWA4680	1B	74.7	1B	543082672	99.5	201	1e-98
wsnp_BG274294B_Ta_2_3	IWA540	1B	74.7	1B	543012537	100	121	3e-56
Excalibur_c8613_1266	IWB29159	1B	74.7	1B	543011530	98.65	74	2e-28
BS00048610_51	IWB8507	1B	74.7	1B	543086017	100	101	3e-45
wsnp_CAP8_rep_c4452_2170021	IWA1231	1B	75.1	1B	542431544	100	183	2e-90
wsnp_CAP11_c543_375403	IWA775	1B	75.1	1B	542431726	100	184	6e-91
Tdurum_contig83770_218	IWB73651	1B	75.1	1B	543473882	96.08	102	2e-38
RAC875_c32077_284	IWB56695	1B	77.3	1B	544130182	100	101	3e-45
wsnp_Ku_c34980_44256215	IWA6945	1B	78	1B	545644564	98.51	201	6e-96
IAAV3567	IWB34737	1B	78	1B	545207315	100	201	2e-100
Ku_c3647_2429	IWB39290	1B	78	1B	545208191	100	101	3e-45
Ku_c3647_769	IWB39291	1B	78	1D	405370680	99.01	101	2e-43
Kukri_rep_c111676_103	IWB49515	1B	78	1B	545800783	99.01	101	2e-43
Tdurum_contig25457_175	IWB69088	1B	78	1B	545644714	100	101	3e-45
Tdurum_contig64811_332	IWB73005	1B	78	1B	547975272	99.01	101	2e-43
Tdurum_contig892_633	IWB73745	1B	78	1B	547583963	100	101	3e-45
wsnp_Ex_c402_791233	IWA3713	1B	78.6	1B	548623547	99.5	201	3e-99
wsnp_Ex_c5098_9047611	IWA4089	1B	78.6	1B	548971423	99.5	201	4e-98
wsnp_Ex_c5245_9283053	IWA4139	1B	78.6	1B	548905092	100	201	2e-100
Ex_c402_1223	IWB20648	1B	78.6	1B	548623211	100	101	3e-45
Excalibur_c17977_71	IWB23054	1B	78.6	1B	548626579	99.01	101	2e-43
IAAV6383	IWB35192	1B	78.6	1B	548623229	99.5	201	1e-98
IACX9308	IWB36372	1B	78.6	1B	551177408	100	132	3e-62
JD_c13631_863	IWB36985	1B	78.6	1B	548626113	99.01	101	2e-43
Ku_c23096_550	IWB38843	1B	78.6	1B	548626795	99.01	101	2e-43
Ku_c241_1597	IWB38882	1B	78.6	1B	548624836	100	101	3e-45
Ku_c892_425	IWB40124	1B	78.6	1B	548624163	99.01	101	2e-43
RAC875_c3835_782	IWB57391	1B	78.6	1B	548536154	100	101	3e-45
BS00010625_51	IWB6256	1B	78.6	1D	409496882	100	101	3e-45
Tdurum_contig42749_3287	IWB71347	1B	78.6	1B	548675761	99.01	101	2e-43
Tdurum_contig42797_1576	IWB71351	1B	78.6	1B	548623111	99.01	101	2e-43
Tdurum_contig42797_3196	IWB71354	1B	78.6	1B	548624736	100	101	3e-45
Tdurum_contig44540_510	IWB71530	1B	78.6	1B	548679383	99.01	101	2e-43
Excalibur_c4459_1867	IWB26560	1B	78.8	1B	548967712	100	101	3e-45
BobWhite_c48550_198	IWB3677	1B	78.8	1B	553143857	100	101	3e-45
Kukri_c1918_1074	IWB42085	1B	78.8	1B	548968507	100	101	3e-45
BS00021975_51	IWB6834	1B	78.8	1B	555765249	99.01	101	2e-43
Tdurum_contig42755_1086	IWB71348	1B	78.8	1B	553143757	100	101	3e-45
wsnp_Ex_c1440_2764269	IWA1889	1B	79.2	1B	551179192	99.5	201	1e-98
wsnp_Ex_c1440_2764867	IWA1890	1B	79.2	1B	551177622	99.5	201	1e-98
BS00096719_51	IWB11968	1B	79.2	1B	551010111	99.01	101	2e-43
RAC875_c95548_156	IWB61131	1B	79.2	1B	551032952	99.01	101	2e-43
wsnp_Ex_rep_c101231_86636951	IWA4999	1B	79.6	1B	555294342	100	201	2e-100
Tdurum_contig42755_379	IWB71349	1B	79.6	1B	553143050	99.01	101	2e-43
BobWhite_rep_c57575_65	IWB5184	1B	81.2	1B	555641182	100	101	3e-45
Tdurum_contig29616_817	IWB69849	1B	82.4	1A	512656438	100	101	3e-45
Tdurum_contig29616_844	IWB69850	1B	82.4	1A	512656411	99.01	101	2e-43
Tdurum_contig48523_1605	IWB71903	1B	82.4	1B	560492840	98.02	101	7e-42
wsnp_Ex_rep_c66389_64589189	IWA5229	1B	82.7	1B	561703732	100	140	2e-66
BS00088039_51	IWB11544	1B	82.7	1D	415414417	98.39	62	8e-22
Tdurum_contig45301_876	IWB71596	1B	82.8	1D	415420258	98.02	101	7e-42
Kukri_c45852_78	IWB45575	1B	83.2	1B	562375788	99	100	6e-43
Excalibur_c60931_1260	IWB27998	1B	83.6	1B	563030480	99.01	101	2e-43
BS00076405_51	IWB10880	1B	83.9	1B	563537124	99.01	101	2e-43
JD_c107_683	IWB36872	1B	83.9	1B	563675996	99.01	101	2e-43
IACX11320	IWB35689	1B	84.5	1B	566831265	100	99	5e-44
Kukri_c15391_468	IWB41378	1B	84.5	1B	566831462	100	101	3e-45
Tdurum_contig42852_667	IWB71367	1B	84.5	1B	565672799	99.01	101	2e-43
Tdurum_contig57101_1160	IWB72548	1B	84.5	1B	565335486	99.01	101	2e-43
Tdurum_contig57101_1235	IWB72549	1B	84.5	1B	565335411	99.01	101	2e-43
Tdurum_contig57101_1349	IWB72550	1B	84.5	1B	565335297	100	101	3e-45
Tdurum_contig57101_2158	IWB72552	1B	84.5	1B	565334488	99	100	6e-43
Tdurum_contig57101_505	IWB72553	1B	84.5	1B	565336567	100	101	3e-45
Tdurum_contig57101_936	IWB72555	1B	84.5	1B	565335710	99.01	101	2e-43
Tdurum_contig604_356	IWB72730	1B	84.5	1B	566762732	99.01	101	2e-43
Tdurum_contig85620_277	IWB73693	1B	85.5	1B	566687792	100	101	3e-45
BS00075248_51	IWB10790	1B	86.1	1B	566827364	99.01	101	2e-43
Excalibur_c9149_1789	IWB29348	1B	86.1	1D	419736145	99.01	101	2e-43
Tdurum_contig604_71	IWB72731	1B	86.1	1B	566762447	99.01	101	2e-43
Kukri_c39698_228	IWB44942	1B	86.6	1B	568522749	97.3	74	8e-27
wsnp_Ex_rep_c107911_91350866	IWA5159	1B	86.9	1B	570277045	99	201	4e-98
wsnp_Ex_rep_c107911_91350930	IWA5160	1B	86.9	1B	570277109	99.5	201	3e-99
wsnp_Ex_c15611_23929128	IWA2041	1B	87.1	1B	570840951	100	201	2e-100
wsnp_Ex_c5101_9052671	IWA4090	1B	87.1	1B	570841976	99.5	201	4e-98
wsnp_RFL_Contig2686_2383517	IWA8373	1B	87.1	1B	572288281	98.73	79	2e-31
IAAV420	IWB34848	1B	87.1	1B	571173551	100	201	2e-100
BS00031596_51	IWB7846	1B	87.1	1B	570483805	100	101	3e-45
Ra_c35710_395	IWB51921	1B	87.8	1B	572913260	98.02	101	7e-42
RAC875_c1188_531	IWB53437	1B	87.8	1B	572676993	100	90	4e-39
BS00089031_51	IWB11589	1B	88.2	1D	424737017	99.01	101	2e-43
Tdurum_contig13117_1316	IWB67865	1B	88.2	1B	573571970	100	101	3e-45
IACX6346	IWB36145	1B	88.6	1B	575868009	99.17	120	6e-54
Kukri_c25961_166	IWB43220	1B	88.6	1B	575863858	99.01	101	2e-43
Kukri_c9752_793	IWB48469	1B	89.1	1B	581205593	99.01	101	2e-43
Tdurum_contig11896_550	IWB67348	1B	89.1	1A	527951826	99.01	101	2e-43
Tdurum_contig69792_167	IWB73156	1B	89.1	1B	581205693	99.01	101	2e-43
BS00076394_51	IWB10877	1B	89.7	1B	583091795	99.01	101	2e-43
IACX299	IWB35892	1B	89.7	1B	583147612	97.75	89	3e-35
Kukri_c7657_986	IWB47688	1B	89.7	1B	583147180	100	101	3e-45
BS00022551_51	IWB7151	1B	89.7	1B	583446285	100	101	3e-45
Kukri_c5336_365	IWB46336	1B	90.1	1B	584108983	99.01	101	2e-43
BS00078029_51	IWB10982	1B	90.7	1A	531225455	98.06	103	2e-42
wsnp_Ex_c6378_11086366	IWA4488	1B	92.6	1B	591113766	98.86	176	4e-83
BS00042244_51	IWB8312	1B	92.6	1B	591233339	99.01	101	2e-43
wsnp_Ex_rep_c67299_65845319	IWA5383	1B	93.3	1B	586296064	98.32	119	2e-51
BS00069125_51	IWB10381	1B	93.3	1B	588484594	100	101	3e-45
BobWhite_c39656_106	IWB3067	1B	93.3	1B	589919646	99.01	101	2e-43
Ku_c9909_1766	IWB40197	1B	93.3	1B	592028916	100	101	3e-45
Kukri_rep_c112383_588	IWB49552	1B	93.3	1D	436193310	98.02	101	7e-42
Excalibur_rep_c106078_822	IWB30173	1B	93.4	1B	589133929	100	101	3e-45
BS00066338_51	IWB9781	1B	93.4	1D	435467447	99.01	101	2e-43
wsnp_Ku_c30494_40319867	IWA6876	1B	93.5	1B	589070584	99	201	1e-97
BobWhite_c17644_456	IWB1073	1B	93.5	1B	589071383	98.02	101	7e-42
RAC875_rep_c99365_219	IWB63380	1B	93.5	1B	589073463	98.97	97	3e-41
BS00023148_51	IWB7446	1B	93.5	1B	589074220	98.99	99	2e-42
Tdurum_contig30536_152	IWB70045	1B	95.1	1B	597462582	100	101	3e-45
CAP7_c1137_53	IWB13742	1B	96.2	1B	598428507	98.04	102	7e-42
Tdurum_contig85180_99	IWB73681	1B	96.2	1B	600887701	97.03	101	3e-40
BS00064162_51	IWB9208	1B	96.8	1B	601007290	100	101	3e-45
wsnp_Ex_c29186_38247956	IWA3216	1B	98.8	1B	605003455	99.23	130	3e-59
Excalibur_rep_c101787_89	IWB29758	1B	99.7	1B	608996477	100	101	3e-45
BS00023940_51	IWB7516	1B	102.3	1B	613421939	100	101	3e-45
BS00023941_51	IWB7517	1B	102.3	1B	613421927	99.01	101	2e-43
Kukri_c19247_53	IWB42095	1B	104.4	1B	614452460	100	101	3e-45
wsnp_Ex_c18384_27213023	IWA2308	1B	106	1B	619691671	98.51	201	8e-95
BS00085821_51	IWB11424	1B	106	1D	449470333	99.01	101	2e-43
IAAV8459	IWB35479	1B	106	1B	619686619	99.5	201	1e-98
IACX906	IWB36344	1B	106	1B	614451906	98.35	121	2e-53
BS00021680_51	IWB6709	1B	106	1B	619692016	99.01	101	2e-43
BS00022851_51	IWB7290	1B	106	1B	619688004	100	101	3e-45
BS00067024_51	IWB9937	1B	106	1B	621634660	100	101	3e-45
wsnp_Ex_c194_381656	IWA2411	1B	108	1B	619685924	99.5	201	1e-98
BS00095088_51	IWB11914	1B	108	1B	619688032	99.01	101	2e-43
Ku_c16636_347	IWB38554	1B	108	1B	619690235	100	101	3e-45
Ku_c79340_308	IWB40040	1B	108	1B	619694218	99	100	6e-43
Kukri_c11389_59	IWB40585	1B	108	1B	619683676	99.01	101	2e-43
RAC875_c4908_1539	IWB58520	1B	108	1B	622466491	100	101	3e-45
BS00041912_51	IWB8293	1B	108	1B	619682651	99.01	101	2e-43
wsnp_BE494527B_Ta_2_1	IWA255	1B	108.1	1B	622467181	99.17	121	2e-54
BS00108257_51	IWB12356	1B	108.1	1B	621270375	100	101	3e-45
BS00110231_51	IWB12497	1B	109	1B	623989423	100	101	3e-45
Excalibur_c40808_441	IWB26166	1B	109	1B	623833280	98.02	101	7e-42
BobWhite_c42716_71	IWB3260	1B	109	1D	453238612	96	100	6e-38
BobWhite_c8016_301	IWB4407	1B	109	1B	623722645	100	101	3e-45
RAC875_c47427_75	IWB58356	1B	109	1B	623731255	100	101	3e-45
RFL_Contig2826_614	IWB64094	1B	109	1B	622571873	98.41	63	2e-22
RFL_Contig5937_1677	IWB65180	1B	109	1B	623730512	100	101	3e-45
Excalibur_c581_947	IWB27784	1B	109.8	1B	624505953	98.8	83	2e-33
Tdurum_contig41945_748	IWB70705	1B	110.8	1B	626070867	99.01	101	2e-43
Tdurum_contig67656_387	IWB73073	1B	110.8	1D	455749575	99.01	101	2e-43
BobWhite_c11309_738	IWB198	1B	111.7	1B	626232055	98.7	77	4e-30
RAC875_c50787_146	IWB58687	1B	111.7	3B	473183859	100	70	6e-28
Tdurum_contig53772_362	IWB72324	1B	114.8	1B	628006470	98.02	101	7e-42
Tdurum_contig61863_130	IWB72831	1B	115	1B	628050247	99.01	101	2e-43
Tdurum_contig65853_242	IWB73032	1B	115	1B	628514291	100	101	3e-45
Tdurum_contig65853_534	IWB73033	1B	115	1B	628514583	100	71	2e-28
BS00034450_51	IWB7976	1B	115	1B	628514653	100	71	2e-28
Excalibur_c11680_81	IWB21947	1B	115.1	1D	457151459	100	101	3e-45
BobWhite_c4375_347	IWB3330	1B	115.1	1B	630926640	98	100	3e-41
IAAV7352	IWB35329	1B	115.1	1B	626713339	99.37	159	2e-75
BobWhite_rep_c54139_273	IWB5074	1B	115.1	1B	630926795	100	101	3e-45
BS00022249_51	IWB6989	1B	115.1	1B	629486935	100	101	3e-45
BS00022411_51	IWB7066	1B	115.1	1B	629159210	99.01	101	2e-43
Tdurum_contig67368_157	IWB73062	1B	115.1	1B	627926665	99	100	6e-43
IACX2961	IWB35890	1B	115.7	1D	458484211	97.41	116	2e-48
BS00021938_51	IWB6808	1B	115.7	1D	458485544	100	101	3e-45
wsnp_JD_c20621_18304110	IWA5915	1B	115.8	1B	630832651	99.36	156	1e-73
BS00067525_51	IWB10068	1B	115.9	1B	632010287	100	101	3e-45
BS00067526_51	IWB10069	1B	116.2	1B	632010348	99.01	101	2e-43
wsnp_Ex_c15796_24173348	IWA2064	1B	116.5	1B	631718045	99	201	5e-97
CAP12_c5744_162	IWB13458	1B	116.7	1B	632010482	100	101	3e-45
Tdurum_contig57927_460	IWB72607	1B	116.7	1B	629159089	100	101	3e-45
BS00107675_51	IWB12325	1B	117.4	1B	634601930	98.02	101	7e-42
RAC875_c13258_955	IWB53690	1B	117.4	1B	636738190	100	101	3e-45
Tdurum_contig15410_446	IWB68408	1B	117.4	5A	549936730	98.02	101	7e-42
BS00089790_51	IWB11625	1B	119.1	1B	638931988	99.01	101	2e-43
Tdurum_contig93532_89	IWB73882	1B	120.8	1B	640559394	100	101	3e-45
BobWhite_c19733_149	IWB1304	1B	121.3	1B	641552919	100	101	3e-45
Excalibur_c96904_336	IWB29570	1B	121.3	1B	640639995	97.03	101	1e-40
IAAV1167	IWB34335	1B	121.3	1D	464319043	99	201	5e-97
wsnp_Ku_rep_c107952_93214466	IWA7422	1B	121.8	1B	642678714	99.5	201	1e-98
IAAV5863	IWB35108	1B	121.8	1B	642476556	98.99	198	2e-95
IAAV7428	IWB35340	1B	121.8	1B	642678609	100	201	2e-100
Tdurum_contig31019_140	IWB70151	1B	122.3	1B	641683255	100	101	3e-45
wsnp_Ku_c18881_28259811	IWA6663	1B	122.9	1B	643101406	99.5	201	1e-98
BS00063721_51	IWB9116	1B	125	1A	558539095	99.01	101	2e-43
Tdurum_contig28675_228	IWB69589	1B	129.4	1B	648593171	99.01	101	2e-43
Kukri_c25512_53	IWB43139	1B	129.7	1D	469801835	98.59	71	8e-27
wsnp_RFL_Contig395_4387107	IWA8542	1B	135.3	1D	470730676	100	77	8e-32
Tdurum_contig12518_200	IWB67636	1B	135.3	1B	654030223	100	101	3e-45
BS00028476_51	IWB7686	1B	135.3	1B	654809199	100	101	3e-45
BS00061472_51	IWB8840	1B	135.3	1B	654241339	100	101	3e-45
BS00071893_51	IWB10582	1B	137.1	1B	658738589	100	101	3e-45
Tdurum_contig19203_152	IWB68779	1B	138.2	1B	658911268	99.01	101	2e-43
Tdurum_contig13250_137	IWB67910	1B	139.2	1B	660106330	98.81	84	5e-34
CAP12_c590_300	IWB13472	1B	140.1	1B	661633464	97.03	101	3e-40
Tdurum_contig29087_280	IWB69700	1B	140.1	1B	661633673	100	101	3e-45
CAP12_c590_307	IWB13473	1B	140.6	1B	661633457	99.01	101	2e-43
Kukri_c18230_1633	IWB41924	1B	142.6	1B	664787672	100	101	3e-45
wsnp_Ra_c53181_56932563	IWA7992	1B	142.7	1B	664804242	100	83	8e-35
wsnp_RFL_Contig2403_1927045	IWA8332	1B	142.7	1D	477217519	100	83	3e-35
wsnp_CAP12_c1337_682282	IWA919	1B	142.7	1B	664772678	99	201	1e-97
BS00078413_51	IWB11006	1B	142.7	1B	662718656	99.01	101	2e-43
BS00078414_51	IWB11007	1B	142.7	1B	662718672	100	101	3e-45
IACX2234	IWB35847	1B	142.7	1B	664302415	100	120	1e-55
Tdurum_contig18557_228	IWB68743	1B	142.7	1B	664285795	100	101	3e-45
Tdurum_contig55429_116	IWB72443	1B	142.7	1B	664302556	99.01	101	2e-43
Tdurum_contig55429_147	IWB72444	1B	142.7	1B	664302525	99.01	101	2e-43
Kukri_c11000_1769	IWB40483	1B	143.5	1B	665398865	98.02	101	3e-41
Kukri_c30490_328	IWB43860	1B	144.3	1D	478817008	97.98	99	1e-40
RAC875_c4047_115	IWB57627	1B	144.3	1B	666916655	98.02	101	7e-42
RAC875_c55934_165	IWB59155	1B	144.3	1B	666824142	100	101	3e-45
BS00028747_51	IWB7694	1B	144.3	1B	666925076	100	101	3e-45
Tdurum_contig4904_2923	IWB71943	1B	144.7	1B	667231214	99.01	101	2e-43
wsnp_Ex_c4436_7981188	IWA3893	1B	145.4	1B	668124648	99.5	201	3e-99
CAP7_rep_c6352_375	IWB14436	1B	145.4	1B	668912357	99.01	101	2e-43
Tdurum_contig4838_349	IWB71884	1B	145.4	1B	668469717	100	101	3e-45
Tdurum_contig4838_519	IWB71885	1B	145.4	1B	668469887	100	101	3e-45
Tdurum_contig4838_718	IWB71886	1B	145.4	1B	668470086	99.01	101	2e-43
Tdurum_contig4997_1022	IWB72029	1B	145.4	1B	668469055	98.98	98	7e-42
Tdurum_contig4997_166	IWB72030	1B	145.4	1B	668468123	98.02	101	7e-42
Tdurum_contig4997_178	IWB72031	1B	145.4	1B	668468135	99.01	101	2e-43
Tdurum_contig4997_816	IWB72032	1B	145.4	1B	668468846	99.01	101	2e-43
Tdurum_contig4997_974	IWB72033	1B	145.4	1B	668469004	100	98	2e-43
IAAV1913	IWB34471	1B	150.9	1B	671995928	96.95	197	5e-87
Tdurum_contig93330_263	IWB73865	1B	150.9	1B	673176270	99.01	101	2e-43
Tdurum_contig94450_255	IWB73912	1B	150.9	1B	671199253	99.01	101	2e-43
BS00023105_51	IWB7427	1B	150.9	1B	672333834	100	101	3e-45
IACX17310	IWB35785	1B	152	1B	673743193	100	147	2e-70
Kukri_c1259_864	IWB40850	1B	152	1B	673176471	98.02	101	7e-42
Tdurum_contig10354_270	IWB66475	1B	152	1B	673786365	100	101	3e-45
Tdurum_contig62905_165	IWB72918	1B	152	1B	673784307	100	101	3e-45
Tdurum_contig84791_198	IWB73674	1B	152.2	1B	674002972	99.01	101	2e-43
BS00103710_51	IWB12210	1B	152.5	1B	674807973	100	101	3e-45
BS00107837_51	IWB12335	1B	152.5	1B	674821532	100	101	3e-45
CAP7_c1788_66	IWB13853	1B	152.5	1B	674608545	99.01	101	2e-43
IAAV6011	IWB35131	1B	152.5	1B	674079991	100	201	2e-100
Tdurum_contig42558_134	IWB71285	1B	152.5	1B	674662198	100	101	3e-45
Tdurum_contig8669_131	IWB73713	1B	152.5	1B	675559564	99.01	101	2e-43
Tdurum_contig8669_296	IWB73714	1B	152.5	1B	675559729	98.59	71	8e-27
BS00060686_51	IWB8817	1B	152.5	1B	675320377	99.01	101	2e-43
wsnp_Ex_rep_c88749_79992654	IWA5758	1B	155.3	1B	676262627	95.22	209	6e-86
BS00093275_51	IWB11800	1B	155.3	1B	677256207	100	101	3e-45
BobWhite_c34125_183	IWB2673	1B	155.3	1B	676271734	100	101	3e-45
BS00033776_51	IWB7948	1B	155.3	1D	486764551	98.81	84	5e-34
BS00063302_51	IWB9040	1B	155.3	1B	676813358	100	101	3e-45
BS00066305_51	IWB9772	1B	155.3	1B	676201206	99.01	101	2e-43
BS00063686_51	IWB9110	1B	156.1	1D	487633551	99.01	101	2e-43
Excalibur_c38500_494	IWB25940	1B	156.3	1B	678257179	99.01	101	2e-43
Tdurum_contig41999_3220	IWB70717	1B	156.3	1B	678318676	99.01	101	2e-43
Tdurum_contig52086_264	IWB72244	1B	156.3	1B	678263256	100	101	3e-45
Tdurum_contig52086_342	IWB72245	1B	156.3	1B	678263178	98.9	91	6e-38
tplb0049h18_765	IWB74944	1B	156.3	1B	678266721	100	101	3e-45
Excalibur_c5888_169	IWB27844	1B	158	1B	679749250	100	101	3e-45
BS00021667_51	IWB6700	1B	158	Un	8830567	99.01	101	2e-43
Tdurum_contig13879_352	IWB68093	1B	158	1B	680162646	99.01	101	2e-43
Tdurum_contig13879_429	IWB68094	1B	158	1B	680162723	97.75	89	3e-35
Tdurum_contig13879_919	IWB68096	1B	158	1B	680163536	97.8	91	1e-35
wsnp_Ex_c649_1279852	IWA4525	1B	160.5	1B	681253235	99.5	201	1e-98
IAAV1732	IWB34435	1B	160.5	1B	682472813	98.08	156	2e-70
RAC875_c28629_101	IWB56212	1B	160.5	1B	682471817	98.46	65	2e-23
Tdurum_contig10099_538	IWB66252	1B	160.5	1B	680867523	99.01	101	2e-43
Tdurum_contig97527_318	IWB74004	1B	160.5	1D	489540207	100	101	3e-45
RAC875_c26801_129	IWB55985	1B	161.5	1B	683471755	100	101	3e-45
RAC875_rep_c112737_766	IWB62169	1B	161.5	1B	683475112	100	101	3e-45
Tdurum_contig29915_167	IWB69918	1B	161.5	1A	589040915	100	89	2e-38
Tdurum_contig44851_593	IWB71547	1B	161.5	1D	491040038	95.96	99	2e-37
wsnp_BG274687B_Ta_2_1	IWA545	1B	162.1	1B	686843235	100	121	3e-56
Kukri_rep_c110309_69	IWB49443	1B	162.1	Un	303751155	100	101	3e-45
RAC875_c5882_307	IWB59404	1B	162.1	1B	683483267	98.02	101	7e-42
Tdurum_contig1631_240	IWB68524	1B	162.1	1B	686840546	99.01	101	2e-43
BS00064948_51	IWB9414	1B	162.1	1B	684044428	100	101	3e-45
Excalibur_c55186_73	IWB27548	1B	162.3	1D	489537435	99.01	101	2e-43
Tdurum_contig44851_927	IWB71549	1B	162.3	1B	683470948	96.04	101	2e-38
wsnp_Ex_c955_1827567	IWA4935	1B	162.5	1B	688767972	100	90	1e-38
BS00082577_51	IWB11265	1B	162.5	1B	688767432	98.88	89	8e-37
Ku_c11537_539	IWB38247	1B	162.5	1B	688769204	100	101	3e-45
Tdurum_contig42108_958	IWB70859	1B	162.5	1B	688707485	99.01	101	2e-43
Tdurum_contig4851_653	IWB71898	1B	162.5	1B	688768701	98.02	101	7e-42
wsnp_Ex_c750_1474351	IWA4694	1B	162.7	1B	686843885	99	201	1e-97
BS00027006_51	IWB7641	1B	163.9	1B	687720466	99.01	101	2e-43
IACX2629	IWB35868	1B	164	Un	9330562	100	120	1e-55
BobWhite_c7691_195	IWB4373	1B	164	Un	9330833	98.02	101	7e-42
Tdurum_contig42960_865	IWB71384	1B	164	1B	688284962	100	101	3e-45
Tdurum_contig58710_411	IWB72625	1B	164	1B	688352419	98.02	101	7e-42
Tdurum_contig92835_177	IWB73820	1B	164	1B	687720350	100	101	3e-45
Tdurum_contig9144_222	IWB73765	1B	164.1	1B	687719783	100	101	3e-45
Tdurum_contig30824_197	IWB70113	2A	0	2A	4214020	99.01	101	2e-43
RAC875_c44680_90	IWB58066	2A	1.6	2A	820543	99.01	101	4e-44
Kukri_rep_c109912_394	IWB49422	2A	1.9	2A	2486807	100	101	3e-45
Tdurum_contig56157_1205	IWB72489	2A	1.9	2A	3334491	99.01	101	2e-43
wsnp_Ex_c11560_18632698	IWA1511	2A	2.3	2A	3101682	96.52	201	3e-89
wsnp_Ex_rep_c67619_66272209	IWA5423	2A	2.3	Un	249551219	99.5	201	3e-99
wsnp_Ku_c13068_20937906	IWA6481	2A	2.3	Un	249551615	99.09	110	4e-48
wsnp_Ku_c23598_33524490	IWA6745	2A	2.3	2A	3447394	99	201	5e-97
Excalibur_rep_c82595_77	IWB31328	2A	2.3	2A	3333709	100	101	3e-45
Tdurum_contig56157_1595	IWB72490	2A	2.3	2A	3335043	98.02	101	7e-42
Tdurum_contig56157_454	IWB72492	2A	2.3	2A	3333609	100	101	3e-45
BS00023052_51	IWB7398	2A	2.3	2A	3111127	99.01	101	2e-43
Ra_c510_171	IWB52199	2A	8.4	2A	5912422	100	101	3e-45
BS00064392_51	IWB9267	2A	8.5	Un	13755820	99.01	101	2e-43
wsnp_Ku_c33374_42877546	IWA6922	2A	8.6	2A	4789998	100	201	2e-100
wsnp_Ex_c342_670243	IWA3468	2A	9.4	2A	5911982	99.5	201	1e-98
wsnp_Ex_c342_670415	IWA3469	2A	9.4	2A	5912154	99.5	201	1e-98
Excalibur_c18324_390	IWB23116	2A	9.4	2D	7972661	100	101	3e-45
BS00022393_51	IWB7056	2A	9.4	2A	5929807	100	101	3e-45
Tdurum_contig76595_208	IWB73389	2A	9.4	2A	7545332	100	101	3e-45
Excalibur_c18324_297	IWB23115	2A	9.9	Un	11751185	100	101	3e-45
IACX8446	IWB36300	2A	9.9	2D	8297126	99.26	135	3e-62
BS00072058_51	IWB10588	2A	10.5	2D	9393852	100	101	3e-45
Excalibur_c10442_1743	IWB21639	2A	11.2	2A	10599480	100	101	3e-45
Excalibur_c41459_69	IWB26232	2A	11.2	2B	18263033	100	65	4e-25
RAC875_c20989_1049	IWB55108	2A	11.2	2D	10335616	100	101	3e-45
BS00012249_51	IWB6542	2A	11.2	2D	11459913	99.01	101	2e-43
Tdurum_contig10785_1669	IWB66736	2A	11.2	2B	19443149	98.02	101	7e-42
Tdurum_contig49928_424	IWB72027	2A	11.2	2D	11843337	98.02	101	7e-42
Tdurum_contig49928_728	IWB72028	2A	11.2	2D	11842924	97.53	81	1e-30
BobWhite_c39184_140	IWB3039	2A	13.2	2B	23364238	97.03	101	1e-40
Tdurum_contig63196_123	IWB72938	2A	13.2	2B	23117825	98.02	101	7e-42
Tdurum_contig74742_135	IWB73228	2A	13.2	2A	14885955	100	101	3e-45
Tdurum_contig74742_546	IWB73230	2A	13.2	2A	14889077	96.04	101	2e-38
Tdurum_contig77522_310	IWB73421	2A	13.2	2D	12697275	96.04	101	2e-38
Tdurum_contig60235_622	IWB72720	2A	15.3	2B	25279738	96	100	6e-38
wsnp_CAP12_c455_248396	IWA965	2A	16.1	2D	14778680	100	201	2e-100
BobWhite_c2512_1588	IWB1879	2A	16.6	2D	573971121	100	101	3e-45
BS00063632_51	IWB9098	2A	16.7	2D	13427785	99.01	101	2e-43
IACX15927	IWB35771	2A	21.9	2A	19101206	99.32	147	1e-68
BS00003867_51	IWB5912	2A	21.9	2D	18232191	98.63	73	6e-28
Kukri_c48683_434	IWB45896	2A	22.8	6A	421529579	100	101	3e-45
BS00111069_51	IWB12622	2A	24.5	2A	21261962	99.01	101	2e-43
Excalibur_c21663_145	IWB23669	2A	24.5	2A	21534313	99.01	101	2e-43
CAP11_c2293_200	IWB12769	2A	35	2A	30147854	99.01	101	2e-43
D_F5XZDLF01EFGMN_252	IWB17580	2A	35	2D	27824425	98	250	4e-118
wsnp_Ex_rep_c93362_82371891	IWA5762	2A	35.6	2A	29877356	99	201	4e-98
CAP8_rep_c8022_270	IWB15066	2A	35.6	2A	30079502	99.01	101	2e-43
RAC875_c11652_544	IWB53380	2A	35.6	2A	30133014	99.01	101	4e-44
BS00075855_51	IWB10837	2A	36.6	2B	47155795	100	101	3e-45
BobWhite_c19433_185	IWB1279	2A	36.6	2A	30866270	100	101	3e-45
Kukri_c33779_1069	IWB44249	2A	36.6	2D	29166312	96.72	61	1e-19
BS00004724_51	IWB5988	2A	36.6	2A	31693375	99.01	101	2e-43
Kukri_c84087_154	IWB47995	2A	36.8	2D	28771165	99.01	101	2e-43
Excalibur_rep_c67994_169	IWB30909	2A	38	2A	32144429	96.04	101	2e-38
IACX8060	IWB36267	2A	38	2D	30252242	98.94	188	8e-90
Kukri_rep_c104307_905	IWB48972	2A	38	2A	32144881	99.01	101	2e-43
RAC875_rep_c78518_198	IWB63132	2A	38	2A	32144233	98.02	101	7e-42
RAC875_rep_c78744_228	IWB63138	2A	38	2A	31957675	100	101	3e-45
BS00022982_51	IWB7354	2A	38	2A	32139771	99.01	101	2e-43
BS00066756_51	IWB9877	2A	38	2A	31978681	99.01	101	2e-43
wsnp_Ex_rep_c103167_88181968	IWA5087	2A	39.6	2A	33044214	99.5	201	1e-98
Ku_c23118_149	IWB38844	2A	43.5	2A	34499158	98.02	101	2e-42
wsnp_Ex_c19556_28530231	IWA2433	2A	46.6	2A	36050509	99	201	1e-97
Tdurum_contig11803_475	IWB67305	2A	46.6	2A	36041014	99.01	101	2e-43
Tdurum_contig11803_850	IWB67307	2A	46.6	2B	54531445	99.01	101	2e-43
Tdurum_contig11803_935	IWB67308	2A	46.6	2A	36039990	99.01	101	2e-43
Tdurum_contig30725_220	IWB70098	2A	46.6	2A	38321682	99.01	101	2e-43
Tdurum_contig66337_52	IWB73041	2A	47.5	2A	37088599	100	101	3e-45
Tdurum_contig32692_271	IWB70375	2A	47.7	2A	38975519	99.01	101	2e-43
wsnp_Ex_c5412_9564046	IWA4212	2A	50.9	2D	36794431	100	101	8e-45
wsnp_Ex_c5412_9564478	IWA4214	2A	50.9	2B	63295838	98.91	183	1e-87
wsnp_Ex_c5412_9564550	IWA4215	2A	50.9	2B	63295784	99.24	131	2e-60
BS00075524_51	IWB10811	2A	51.6	2A	42390200	100	101	3e-45
Tdurum_contig55610_784	IWB72463	2A	51.6	2A	42475903	98.02	101	7e-42
Ku_c8180_291	IWB40060	2A	52.1	2A	40545343	100	101	3e-45
Tdurum_contig42283_347	IWB71058	2A	52.9	2A	44094510	100	101	3e-45
Tdurum_contig46797_585	IWB71719	2A	52.9	2A	44836474	97.67	86	2e-33
Tdurum_contig9716_553	IWB73975	2A	52.9	2B	68223909	99.01	101	2e-43
BS00064905_51	IWB9401	2A	52.9	Un	314905379	98.96	96	1e-40
RAC875_c10616_199	IWB53117	2A	53	2A	46107437	99.01	101	2e-43
BS00022013_51	IWB6858	2A	54.6	2A	49851327	100	65	4e-25
IACX304	IWB35896	2A	63.4	2A	55175840	98.35	121	3e-52
Ra_c37244_428	IWB51951	2A	66.3	2B	92797357	94.06	101	1e-34
Tdurum_contig61315_104	IWB72779	2A	66.3	2A	58019008	100	101	3e-45
Tdurum_contig66015_346	IWB73038	2A	66.3	2A	58394903	99.01	101	2e-43
wsnp_Ex_c15822_24204224	IWA2067	2A	67.3	2A	59322666	100	201	2e-100
wsnp_Ex_c22645_31845530	IWA2730	2A	67.3	2A	59323026	99	201	1e-97
wsnp_Ex_c22645_31845564	IWA2731	2A	67.3	2A	59323060	99.5	201	3e-99
BS00083146_51	IWB11289	2A	67.3	2A	59323210	100	101	3e-45
wsnp_Ku_c15567_24224486	IWA6566	2A	67.5	2A	61287668	98.03	203	3e-94
BS00070692_51	IWB10489	2A	67.5	2A	62302370	99.01	101	2e-43
Tdurum_contig47258_1039	IWB71778	2A	67.5	2A	59558215	99.01	101	2e-43
Tdurum_contig93115_517	IWB73849	2A	68.6	2A	63137318	99.01	101	2e-43
Kukri_c67276_76	IWB47380	2A	70.3	2B	105909405	100	101	3e-45
wsnp_Ex_c2887_5330426	IWA3193	2A	74.6	2A	71623182	100	201	2e-100
Kukri_rep_c73477_888	IWB50267	2A	78	2D	73022372	100	97	6e-43
Tdurum_contig560_239	IWB72480	2A	78	2A	72382644	98.77	81	2e-32
Tdurum_contig560_297	IWB72481	2A	78	2A	72381618	98.77	81	2e-32
wsnp_Ex_c2887_5330787	IWA3194	2A	90.2	2B	110464985	99.17	121	3e-54
Excalibur_c15733_252	IWB22683	2A	90.7	2A	74789429	98.84	86	3e-35
Excalibur_c3108_5476	IWB25061	2A	90.7	2A	74968046	99.01	101	2e-43
Excalibur_rep_c111743_194	IWB30556	2A	90.7	2A	74789632	98.55	69	1e-25
RAC875_c20700_853	IWB55048	2A	90.7	2A	74877814	100	101	3e-45
Tdurum_contig44400_1610	IWB71526	2A	90.7	2A	74136323	100	101	3e-45
Tdurum_contig9731_121	IWB73981	2A	90.7	2A	74164556	100	101	3e-45
BS00039209_51	IWB8160	2A	90.7	2A	74164456	100	101	3e-45
Tdurum_contig44400_1556	IWB71525	2A	91.6	2D	74966390	98.02	101	7e-42
Tdurum_contig9731_62	IWB73982	2A	91.6	2A	74164615	100	101	3e-45
BobWhite_c38953_251	IWB3016	2A	91.9	2A	77195614	97.03	101	3e-41
RAC875_c27556_226	IWB56082	2A	91.9	2A	75927705	99.01	101	2e-43
Tdurum_contig5311_67	IWB72304	2A	91.9	2A	75292183	97.03	101	3e-40
Tdurum_contig82812_213	IWB73597	2A	91.9	2A	75316383	100	92	3e-40
wsnp_Ex_rep_c68113_66877517	IWA5495	2A	92.1	2A	77529545	99.17	121	3e-54
wsnp_CAP11_rep_c8768_3788007	IWA901	2A	92.1	2A	78328762	99.44	177	2e-85
IAAV733	IWB35327	2A	92.1	2A	78328938	97.51	201	5e-92
Kukri_rep_c104727_91	IWB49021	2A	92.1	2A	77756723	99.01	101	2e-43
Tdurum_contig9070_142	IWB73758	2A	92.1	2A	77941747	99.01	101	2e-43
wsnp_Ex_c15325_23565935	IWA2007	2A	92.3	2A	78330979	100	108	1e-48
wsnp_BE497494A_Td_2_1	IWA293	2A	92.3	2A	78334652	99.17	121	4e-55
BS00079443_51	IWB11079	2A	93.2	2D	79420194	98.73	79	3e-31
Excalibur_c48978_98	IWB27013	2A	93.2	2A	80540475	100	101	3e-45
RAC875_c24517_558	IWB55668	2A	93.2	2A	78843928	99.01	101	2e-43
RAC875_rep_c73925_276	IWB62989	2A	93.2	2A	79748661	100	101	3e-45
BS00021739_51	IWB6749	2A	93.2	2A	79748538	99.01	101	2e-43
Excalibur_c44080_386	IWB26523	2A	93.6	2A	82345303	99.01	101	2e-43
BS00074780_51	IWB10760	2A	96	2A	86905826	100	101	3e-45
BobWhite_c3644_491	IWB2840	2A	96	2A	87891199	98.88	89	8e-37
BobWhite_c12252_476	IWB329	2A	96	2A	85289008	100	93	1e-40
IAAV2376	IWB34544	2A	96	2B	135095308	100	79	1e-32
IACX636	IWB36149	2A	96	2A	89120336	99.17	121	4e-55
Kukri_c29034_801	IWB43629	2A	96	2A	87881549	99.01	101	2e-43
Kukri_c7139_1248	IWB47511	2A	96	2D	87256148	100	101	3e-45
Kukri_rep_c105404_235	IWB49088	2A	96	2A	86437100	100	101	3e-45
Ra_c2655_504	IWB51634	2A	96	2A	85595944	100	101	3e-45
Tdurum_contig15512_407	IWB68419	2A	96	2B	139351551	96.04	101	2e-38
Tdurum_contig44062_733	IWB71483	2A	96	2A	89768147	99.01	101	2e-43
tplb0045j05_1405	IWB74831	2A	96	2B	140765509	98.02	101	7e-42
BS00043083_51	IWB8331	2A	96	2A	83828052	100	85	3e-36
Kukri_c42616_467	IWB45265	2A	96.2	2A	87855234	100	101	3e-45
RAC875_c25986_82	IWB55871	2A	96.2	2A	87856990	99.01	101	2e-43
Tdurum_contig44900_441	IWB71568	2A	96.2	2A	88016091	99.01	101	2e-43
Tdurum_contig64391_231	IWB72980	2A	96.2	2A	88012393	99.01	101	2e-43
Tdurum_contig76802_141	IWB73397	2A	96.2	2A	88281982	99.01	101	2e-43
wsnp_BE498730A_Ta_2_2	IWA314	2A	96.3	2A	90742048	98.35	121	2e-53
Tdurum_contig56511_144	IWB72516	2A	96.3	2A	88732386	98.02	101	7e-42
wsnp_CD453913A_Ta_2_1	IWA1256	2A	97.3	2A	96073270	99.17	121	2e-54
wsnp_Ex_c1767_3341220	IWA2245	2A	97.3	2A	99148709	98.01	201	1e-92
wsnp_Ex_rep_c66448_64683704	IWA5240	2A	97.3	2B	146913407	99.5	201	1e-98
Excalibur_c21269_176	IWB23617	2A	97.3	2A	93926917	100	101	3e-45
BobWhite_c5562_219	IWB3900	2A	97.3	2A	93936299	98.02	101	7e-42
RAC875_rep_c119471_174	IWB62501	2A	97.3	2A	101994179	99.01	101	2e-43
BobWhite_c14530_51	IWB664	2A	97.3	2A	98124124	100	101	3e-45
Tdurum_contig45580_1717	IWB71619	2A	97.3	2A	93885887	97.33	75	8e-27
Tdurum_contig45580_2786	IWB71620	2A	97.3	2A	93882600	99.01	101	2e-43
Tdurum_contig62073_376	IWB72859	2A	97.3	2A	101994279	99.01	101	2e-43
Tdurum_contig62073_631	IWB72860	2A	97.3	2D	102880819	99.01	101	2e-43
Tdurum_contig93884_223	IWB73897	2A	97.3	2A	98124024	100	101	3e-45
wsnp_Ex_rep_c69124_68035904	IWA5586	2A	99	2A	115421898	99.45	181	4e-87
Excalibur_c11398_913	IWB21864	2A	99	2A	118446554	99.01	101	2e-43
IAAV263	IWB34587	2A	99	2A	118673112	99.5	201	1e-98
JD_c2020_434	IWB37153	2A	99	2A	118673262	99.01	101	2e-43
Kukri_c44997_377	IWB45501	2A	99	2D	113509996	97.98	99	3e-40
Kukri_c45015_145	IWB45502	2A	99	2A	117180927	99.01	101	2e-43
Kukri_c53629_239	IWB46352	2A	99.6	2B	168610766	98.67	75	5e-29
Tdurum_contig47103_94	IWB71756	2A	99.6	2A	118667870	97.03	101	3e-40
wsnp_CAP12_c948_496702	IWA994	2A	99.8	2A	121217601	99.44	180	5e-87
Kukri_c22553_60	IWB42663	2A	100.1	2B	175638582	99.01	101	2e-43
Tdurum_contig33419_124	IWB70428	2A	101.5	2A	138188413	99.01	101	2e-43
Tdurum_contig33419_337	IWB70429	2A	101.5	2A	138188626	98.86	88	3e-36
wsnp_CAP11_c1787_968410	IWA690	2A	101.6	2A	148871200	99.29	140	5e-65
Excalibur_c6027_1035	IWB27952	2A	101.6	2A	141270314	100	91	1e-39
Kukri_c7169_105	IWB47516	2A	101.6	2A	138183564	99.01	101	2e-43
Tdurum_contig42331_2843	IWB71086	2A	101.6	2D	133255015	100	81	5e-34
wsnp_BG607088A_Ta_1_1	IWA581	2A	102	2A	156762946	99.17	121	4e-55
BS00089457_51	IWB11613	2A	102	2A	157933779	100	101	3e-45
BobWhite_c2532_966	IWB1896	2A	102	2A	154415578	99.01	101	2e-43
Excalibur_c27210_183	IWB24557	2A	102	2D	149681697	98.02	101	2e-42
wsnp_Ex_c22862_32074455	IWA2758	2A	104	2A	165848240	99.5	201	1e-98
wsnp_BG263521A_Ta_2_2	IWA534	2A	104	2A	165849484	100	121	3e-56
BobWhite_c23953_312	IWB1773	2A	104	2D	155833416	100	101	3e-45
Kukri_c92410_451	IWB48297	2A	104	2A	164267846	100	96	2e-42
Kukri_c52614_291	IWB46270	2A	105.9	2D	180882643	100	101	3e-45
wsnp_Ex_c23720_32957892	IWA2831	2A	107.6	2A	205201594	100	201	2e-100
IAAV3570	IWB34738	2A	107.6	2A	205217451	99.5	201	1e-98
wsnp_Ex_c1064_2034518	IWA1370	2A	107.7	2A	257854805	99.01	202	1e-97
wsnp_Ex_c45617_51361414	IWA3946	2A	107.7	2A	364403481	99.4	168	6e-81
wsnp_Ku_c38662_47257696	IWA6991	2A	107.7	2A	360419488	99.29	141	6e-66
BS00078923_51	IWB11038	2A	107.7	2A	332044283	99.01	101	2e-43
BS00080997_51	IWB11160	2A	107.7	2A	293892230	99.01	101	2e-43
BS00097263_51	IWB11991	2A	107.7	2A	210470370	98.95	95	3e-40
CAP7_rep_c6939_197	IWB14447	2A	107.7	2A	379151239	99.01	101	2e-43
Ex_c4639_2631	IWB20771	2A	107.7	2A	384890413	99.01	101	2e-43
Excalibur_c56144_207	IWB27632	2A	107.7	2D	228435957	100	101	3e-45
IAAV6661	IWB35232	2A	107.7	2A	335395898	99.5	201	1e-98
Kukri_c5358_1252	IWB46348	2A	107.7	2A	275932923	98.97	97	3e-41
Ra_c15292_990	IWB51159	2A	107.7	2A	219148504	99.02	102	2e-43
RAC875_c76620_361	IWB60425	2A	107.7	2A	376752658	99.01	101	2e-43
RAC875_rep_c101788_71	IWB61328	2A	107.7	2A	371045922	98.73	79	3e-31
BS00011045_51	IWB6333	2A	107.7	2A	281756683	100	101	3e-45
Tdurum_contig10079_675	IWB66224	2A	107.7	2B	382584178	100	101	3e-45
Tdurum_contig42041_4577	IWB70764	2A	107.7	2B	389472197	100	100	1e-44
Tdurum_contig5094_505	IWB72132	2A	107.7	2A	372230661	99.01	101	2e-43
Tdurum_contig62559_146	IWB72898	2A	107.7	2A	387039638	99.01	101	2e-43
Tdurum_contig6356_150	IWB72951	2A	107.7	2A	438726261	99.01	101	2e-43
Tdurum_contig65916_1270	IWB73034	2A	107.7	2A	384679748	99.01	101	2e-43
Tdurum_contig93110_358	IWB73848	2A	107.7	2A	391110290	96.04	101	2e-38
Tdurum_contig94996_512	IWB73926	2A	107.7	2A	417745732	100	101	3e-45
BS00031140_51	IWB7823	2A	107.7	2A	241087161	99.01	101	2e-43
wsnp_BE517627A_Ta_2_1	IWA336	2A	107.8	2A	414500090	99.17	121	2e-54
CAP7_c239_267	IWB13915	2A	107.8	2A	392729119	99.01	101	2e-43
Excalibur_c18267_118	IWB23105	2A	107.8	2A	413336291	100	101	3e-45
Ra_c7199_1504	IWB52560	2A	107.8	2A	408083388	99.01	101	2e-43
Tdurum_contig11876_1375	IWB67334	2A	107.8	2A	394021677	99.01	101	2e-43
Tdurum_contig75776_2822	IWB73313	2A	108.7	2D	332332278	99.01	101	2e-43
wsnp_be498599A_Ta_2_2	IWA309	2A	108.9	2A	468534103	99.17	121	4e-55
wsnp_Ex_rep_c66615_64916512	IWA5273	2A	108.9	2A	498105025	100	201	2e-100
CAP7_c11156_108	IWB13733	2A	108.9	2A	463251174	100	101	3e-45
Excalibur_rep_c66270_789	IWB30726	2A	108.9	2A	461979007	99.01	101	2e-43
RAC875_c3814_437	IWB57378	2A	108.9	2D	351403112	100	101	3e-45
Tdurum_contig27844_127	IWB69340	2A	108.9	2B	441859900	99.01	101	2e-43
Tdurum_contig42524_87	IWB71262	2A	108.9	2A	486204609	99.01	101	2e-43
Tdurum_contig75565_1388	IWB73280	2A	108.9	2A	461978907	99.01	101	2e-43
Tdurum_contig75565_1593	IWB73281	2A	108.9	2A	461979112	98.02	101	7e-42
Excalibur_c65611_463	IWB28385	2A	109	2B	440824655	100	86	8e-37
IAAV9024	IWB35580	2A	109	2A	504274071	100	201	2e-100
Kukri_c57491_132	IWB46662	2A	109	2A	502335158	98.92	93	4e-39
Kukri_c57491_156	IWB46663	2A	109	2B	440825124	100	69	2e-27
CAP7_c3491_203	IWB14023	2A	109.3	2A	504329462	100	101	3e-45
wsnp_Ex_rep_c66800_65171259	IWA5303	2A	109.4	2A	504344543	99.35	153	9e-73
wsnp_Ex_c25057_34318425	IWA2948	2A	109.5	2A	505086884	96.23	159	6e-66
wsnp_Ex_rep_c66800_65171198	IWA5302	2A	109.5	2A	504344482	99.5	201	3e-99
IAAV444	IWB34874	2A	109.5	2A	504711194	99.36	156	7e-74
BobWhite_rep_c64242_111	IWB5448	2A	109.5	2A	504344632	100	101	3e-45
wsnp_Ex_rep_c68599_67447880	IWA5549	2A	109.9	2D	372928948	97.79	136	8e-60
wsnp_Ku_rep_c69876_69364477	IWA7464	2A	109.9	2D	372925295	100	140	2e-66
RAC875_c11272_443	IWB53298	2A	109.9	2D	372928845	100	101	3e-45
BS00077693_51	IWB10949	2A	112	2A	515945754	100	101	3e-45
Tdurum_contig27794_724	IWB69315	2A	112	2D	382196121	99.01	101	2e-43
BS00078925_51	IWB11039	2A	113	2A	540773106	99.01	101	2e-43
BS00021929_51	IWB6803	2A	113.3	2D	398467235	99.01	101	2e-43
RFL_Contig5718_722	IWB65100	2A	113.6	2A	533895272	100	95	7e-42
BS00055514_51	IWB8665	2A	114.5	2A	543625444	100	101	3e-45
Excalibur_rep_c103924_189	IWB30000	2A	114.7	2A	546942369	100	67	3e-26
Kukri_c58791_906	IWB46763	2A	114.7	2A	581579658	100	101	3e-45
BS00036985_51	IWB8076	2A	114.7	2A	580761100	100	101	3e-45
BS00062756_51	IWB8916	2A	114.7	2A	579831213	100	101	3e-45
BS00062757_51	IWB8917	2A	114.7	2A	579831148	100	101	3e-45
wsnp_Ra_c4503_8155485	IWA7947	2A	122.2	2A	606826248	99.5	201	1e-98
Kukri_c24064_2095	IWB42913	2A	122.2	2A	606826098	99.01	101	2e-43
BS00049644_51	IWB8551	2A	122.2	2A	605184993	98.86	88	3e-36
Tdurum_contig42540_843	IWB71282	2A	123.9	2A	610235674	100	101	3e-45
Ra_c34214_1320	IWB51885	2A	125	2D	469985274	100	101	3e-45
BS00041816_51	IWB8290	2A	125	2A	611316418	99.01	101	2e-43
Tdurum_contig5114_319	IWB72154	2A	136	2A	663653622	99.01	101	2e-43
Tdurum_contig45838_263	IWB71648	2A	143.2	2B	636209054	100	101	3e-45
IAAV2718	IWB34603	2A	144	2A	681106657	100	133	8e-63
wsnp_be471201A_Ta_1_1	IWA200	2A	145.8	2A	690934330	99.17	121	2e-54
Excalibur_c6660_746	IWB28454	2A	145.8	2A	691218486	99.01	101	2e-43
Kukri_c7193_3176	IWB47525	2A	145.8	2A	691224816	99.01	101	2e-43
Kukri_c7193_5892	IWB47527	2A	145.8	2D	547678708	99.01	101	2e-43
wsnp_Ex_c10084_16572374	IWA1275	2A	145.9	2A	692934406	100	201	2e-100
wsnp_Ex_c7829_13320760	IWA4733	2A	145.9	2A	693293377	99.5	201	3e-99
wsnp_BG274584B_Ta_2_1	IWA543	2A	145.9	2B	657791519	99.17	121	2e-54
wsnp_BG274584B_Ta_2_3	IWA544	2A	145.9	2B	657791845	99.17	121	2e-54
BobWhite_c3833_815	IWB2961	2A	145.9	2A	692850216	100	101	3e-45
IAAV7130	IWB35296	2A	145.9	2B	657792753	100	136	3e-64
Kukri_c29170_680	IWB43663	2A	145.9	2A	693293527	100	101	3e-45
BS00000965_51	IWB5777	2A	145.9	2A	703545849	100	101	3e-45
BS00023214_51	IWB7479	2A	145.9	2A	693294596	100	87	2e-37
RAC875_c1781_1137	IWB54549	2A	146.5	2D	556949986	98.02	101	7e-42
BS00077597_51	IWB10941	2A	148	2A	699422727	99.01	101	2e-43
BS00096882_51	IWB11977	2A	148	2A	700955108	99.01	101	2e-43
BobWhite_c20952_105	IWB1460	2A	150.4	2A	703709444	98.02	101	3e-41
Excalibur_c40617_983	IWB26154	2A	150.4	2A	703976501	100	101	3e-45
RAC875_c13861_1248	IWB53795	2A	151.2	2A	705507073	99.01	101	2e-43
wsnp_JD_c15127_14676522	IWA5855	2A	152.1	2A	705784347	99.4	166	3e-79
Excalibur_c14536_1129	IWB22458	2A	152.5	2A	705826614	99.01	101	2e-43
BS00029332_51	IWB7714	2A	152.5	2A	705804910	100	101	3e-45
wsnp_Ku_c28467_38394907	IWA6845	2A	154.6	2A	709851910	99	201	5e-97
wsnp_Ra_c10658_17500498	IWA7540	2A	154.6	2B	689871539	99	201	5e-97
CAP12_c2521_103	IWB13304	2A	154.6	2A	711980204	100	101	3e-45
BobWhite_c11081_1619	IWB170	2A	154.6	2A	711641774	98.82	85	1e-34
Excalibur_c22687_1139	IWB23837	2A	154.6	2A	709774671	99.01	101	2e-43
Excalibur_c2426_1756	IWB24123	2A	154.6	2A	712721451	100	101	3e-45
Excalibur_c7282_512	IWB28643	2A	154.6	2A	710099665	99.01	101	2e-43
Excalibur_rep_c108662_132	IWB30356	2A	154.6	2B	682039380	99.01	101	2e-43
Excalibur_rep_c108662_154	IWB30357	2A	154.6	2B	682039402	99.01	101	2e-43
BobWhite_c39518_134	IWB3063	2A	154.6	2A	709833617	100	101	3e-45
Ku_c68792_310	IWB39836	2A	154.6	2D	574104825	100	75	1e-30
Ku_c69608_894	IWB39857	2A	154.6	2A	712578023	99.01	101	2e-43
Kukri_c9145_1193	IWB48259	2A	154.6	2A	709774734	100	83	3e-35
Kukri_rep_c104611_210	IWB49008	2A	154.6	2A	709850046	99.01	101	2e-43
Kukri_rep_c69608_375	IWB49915	2A	154.6	2A	712578935	100	101	3e-45
RAC875_c110838_423	IWB53237	2A	154.6	2D	574351399	98.02	101	7e-42
RAC875_c17696_225	IWB54523	2A	154.6	2B	690219282	98.91	92	2e-38
RAC875_rep_c77617_1454	IWB63110	2A	154.6	2A	709833698	100	82	1e-34
Tdurum_contig14707_251	IWB68283	2A	154.6	2D	576850955	99.01	101	2e-43
BS00022587_51	IWB7166	2A	154.6	2A	711077273	99.01	101	2e-43
Tdurum_contig55729_1220	IWB72470	2A	154.6	2B	683036365	97.03	101	3e-40
Tdurum_contig80351_311	IWB73472	2A	154.6	2B	683047376	98.02	101	7e-42
Kukri_c74165_204	IWB47578	2A	157.7	2D	577598921	99.01	101	4e-44
wsnp_Ex_c10751_17505459	IWA1385	2A	158.7	2A	716903360	100	93	2e-40
wsnp_Ex_c59095_60108185	IWA4375	2A	158.7	2A	716456317	98.51	201	2e-96
Jagger_c9554_114	IWB36821	2A	158.7	2A	716548992	99.01	101	2e-43
Ku_c15323_908	IWB38485	2A	158.7	7B	312821633	100	101	3e-45
Kukri_c33828_801	IWB44254	2A	158.7	2A	716918452	98.99	99	2e-42
tplb0052d08_1158	IWB75001	2A	158.7	2A	719528019	100	101	3e-45
BobWhite_c16923_64	IWB973	2A	158.7	2B	706269835	100	101	3e-45
wsnp_Ex_c59095_60108118	IWA4374	2A	159.1	2A	716456384	98.51	201	2e-96
wsnp_Ra_c32271_41304469	IWA7864	2A	159.1	2A	716457625	100	201	2e-100
Jagger_c4026_255	IWB36583	2A	159.1	2A	717170754	98.98	98	7e-42
Jagger_c4026_328	IWB36584	2A	159.1	2A	717170824	100	97	6e-43
RAC875_c42648_115	IWB57860	2A	159.1	2A	716169543	99.01	101	2e-43
BS00080752_51	IWB11143	2A	159.9	2A	718355388	100	101	3e-45
BS00081506_51	IWB11193	2A	159.9	2A	718730480	99.01	101	2e-43
BS00108775_51	IWB12381	2A	159.9	2A	718722609	100	98	2e-43
Excalibur_c1140_1044	IWB21867	2A	159.9	2D	584250210	100	101	3e-45
Excalibur_c685_165	IWB28504	2A	159.9	2D	581523967	99.01	101	2e-43
Tdurum_contig11678_289	IWB67229	2A	162.2	2B	709822023	99.01	101	2e-43
Ku_c25175_1248	IWB38933	2A	162.3	2A	722134556	99.01	101	2e-43
Ra_c70114_3713	IWB52501	2A	162.3	2A	722141783	99.01	101	2e-43
wsnp_Ex_c14953_23104041	IWA1960	2A	169.3	2A	728758430	99.5	201	1e-98
wsnp_RFL_Contig2763_2509104	IWA8385	2A	169.3	2B	721113142	99.01	101	2e-43
BS00057059_51	IWB8706	2A	169.3	2A	729287961	99.01	101	2e-43
BS00057060_51	IWB8707	2A	169.3	2A	729288358	98.99	99	2e-42
Kukri_c25901_348	IWB43208	2A	171	2A	733353576	100	101	3e-45
Kukri_c30973_414	IWB43924	2A	171	2D	599291386	100	101	3e-45
BS00024921_51	IWB7563	2A	171	2A	733091224	100	101	3e-45
RAC875_rep_c69619_78	IWB62594	2A	176.1	2A	734352082	100	71	2e-28
wsnp_Ex_rep_c102390_87572532	IWA5066	2A	176.5	2A	734525462	100	134	4e-63
Kukri_c22047_313	IWB42586	2A	176.5	2A	734148841	99.01	101	2e-43
RAC875_c19904_308	IWB54915	2A	176.5	2A	734972887	100	101	3e-45
BS00009817_51	IWB6121	2A	176.5	2A	735007873	100	83	3e-35
Tdurum_contig45661_684	IWB71626	2A	179	2A	738387476	100	101	3e-45
Tdurum_contig93508_295	IWB73879	2A	179.5	2A	738985853	99.01	101	2e-43
Tdurum_contig60298_219	IWB72722	2A	179.6	2A	739448856	100	101	3e-45
wsnp_Ex_c15681_24015996	IWA2052	2A	180.3	2A	739876213	99.5	201	1e-98
wsnp_Ex_c15681_24016359	IWA2053	2A	180.3	2A	739875850	99.5	201	1e-98
wsnp_Ex_rep_c70299_69243835	IWA5686	2A	180.3	2A	740361207	99.5	201	1e-98
Kukri_c25978_561	IWB43225	2A	180.3	2A	740361057	99.01	101	2e-43
Excalibur_c42110_66	IWB26297	2A	181.2	2A	744283491	100	101	3e-45
Kukri_c34983_190	IWB44394	2A	181.2	2A	740010373	99.01	101	2e-43
RAC875_c33037_578	IWB56801	2A	181.2	2D	609437789	99.01	101	2e-43
Excalibur_c8009_325	IWB28945	2A	182.3	2A	744811522	100	99	4e-44
Kukri_rep_c110061_249	IWB49434	2A	182.3	2D	88603146	98.67	75	5e-29
Kukri_rep_c68300_216	IWB49774	2A	182.3	2D	88600951	96.04	101	2e-38
BS00023144_51	IWB7444	2A	182.3	2D	611895887	100	101	3e-45
BS00030165_51	IWB7758	2A	182.3	2A	744809755	99.01	101	2e-43
Tdurum_contig49145_914	IWB71948	2A	186.1	2A	745038630	100	101	3e-45
BS00022409_51	IWB7065	2A	186.2	2A	745092315	100	101	3e-45
IACX6200	IWB36122	2A	186.5	2D	616571077	99.17	120	6e-54
Tdurum_contig84245_154	IWB73663	2A	186.8	2A	746761721	100	101	3e-45
IACX3245	IWB35910	2A	187.4	2A	747089705	100	120	1e-55
BS00062732_51	IWB8907	2A	187.4	2A	747090405	99.01	101	2e-43
Tdurum_contig63071_67	IWB72933	2A	187.7	2A	747627037	97.03	101	3e-40
Tdurum_contig8926_1118	IWB73747	2A	187.9	2A	748444608	100	101	3e-45
Excalibur_c37727_66	IWB25863	2A	188.5	2D	618248337	95.05	101	8e-37
wsnp_Ex_rep_c101342_86720058	IWA5007	2A	189.8	2A	752276515	99	201	1e-97
wsnp_JD_c13946_13810300	IWA5840	2A	189.8	2A	752091604	99	201	5e-97
Excalibur_rep_c110586_1083	IWB30487	2A	189.8	2A	752277414	99.01	101	2e-43
BobWhite_c5178_188	IWB3746	2A	189.8	2A	751511267	100	101	3e-45
Tdurum_contig49532_368	IWB71975	2A	189.8	2B	760949989	99.01	101	2e-43
Tdurum_contig67827_89	IWB73085	2A	189.8	2A	752749765	99.01	101	2e-43
Tdurum_contig9212_1109	IWB73775	2A	189.8	2A	752276618	98.02	101	7e-42
Tdurum_contig9212_1196	IWB73776	2A	189.8	2A	752276531	98.02	101	7e-42
Tdurum_contig9212_1287	IWB73777	2A	189.8	2A	752276440	99.01	101	2e-43
Tdurum_contig9212_182	IWB73779	2A	189.8	2A	752277545	100	95	7e-42
Tdurum_contig9212_230	IWB73780	2A	189.8	2B	760951121	97.03	101	3e-40
Tdurum_contig9212_392	IWB73781	2A	189.8	2A	752277335	100	101	3e-45
Tdurum_contig9212_527	IWB73782	2A	189.8	2A	752277200	100	101	3e-45
BS00023202_51	IWB7471	2A	189.8	2B	759491045	96.04	101	2e-38
BS00108288_51	IWB12358	2A	193.1	2A	754349336	100	101	3e-45
Tdurum_contig47508_250	IWB71816	2A	193.1	2A	754339235	100	101	3e-45
BS00023075_51	IWB7413	2A	193.1	2A	754339135	100	101	3e-45
BS00063368_51	IWB9045	2A	193.1	2A	754356881	100	101	3e-45
BS00102709_51	IWB12196	2A	193.4	2A	754451030	100	101	3e-45
Kukri_c78358_129	IWB47764	2A	193.4	2D	623328357	100	101	3e-45
Tdurum_contig94203_610	IWB73906	2A	193.4	2A	754455115	99.01	101	2e-43
RAC875_c1706_1888	IWB54406	2A	194.7	2A	755776286	100	101	3e-45
wsnp_Ra_c6586_11477949	IWA8036	2A	194.8	2D	624665009	100	90	1e-38
wsnp_Ku_c26323_36285601	IWA6797	2A	196.5	2A	757948337	99	201	1e-97
Excalibur_c44834_80	IWB26593	2A	196.5	2A	757943016	99.01	101	2e-43
wsnp_BE498892A_Ta_2_25	IWA319	2A	197.4	2A	779819543	93.39	121	1e-41
wsnp_Ku_c16547_25454123	IWA6600	2A	197.6	2A	759829774	99	201	5e-97
wsnp_Ku_c2838_5354231	IWA6839	2A	197.6	2A	779670606	98.51	201	2e-95
wsnp_Ra_c17622_26522072	IWA7671	2A	197.6	2A	759489138	96.53	173	8e-75
BS00097473_51	IWB12001	2A	197.6	2A	760564912	99.01	101	2e-43
Ex_c36309_435	IWB20572	2A	197.6	2D	628938282	99.01	101	2e-43
Excalibur_c17000_557	IWB22893	2A	197.6	2D	628941024	98.75	80	8e-32
Excalibur_c40335_198	IWB26131	2A	197.6	2D	633755665	98.02	101	7e-42
Excalibur_c7971_1573	IWB28927	2A	197.6	2D	631961285	98.02	101	7e-42
Excalibur_c7971_985	IWB28929	2A	197.6	2B	775370360	98.77	81	2e-32
Excalibur_c923_837	IWB29388	2A	197.6	2A	758396191	100	101	3e-45
IAAV4880	IWB34944	2A	197.6	2A	780714629	100	201	2e-100
IAAV6102	IWB35144	2A	197.6	2A	760565621	99.29	140	2e-64
JD_c11825_1135	IWB36916	2A	197.6	2B	770680802	100	76	3e-31
Ku_c10387_272	IWB38096	2A	197.6	5B	232178	100	101	3e-45
Kukri_c30117_214	IWB43813	2A	197.6	2D	631958849	100	101	3e-45
Kukri_c44231_1576	IWB45415	2A	197.6	2B	775170774	98.02	101	7e-42
RAC875_c22328_490	IWB55327	2A	197.6	2A	759813897	100	95	7e-42
RAC875_c259_1339	IWB55863	2A	197.6	2A	759830867	98.02	101	7e-42
BS00011539_51	IWB6431	2A	197.6	2A	758421302	99.01	101	2e-43
RFL_Contig4567_218	IWB64728	2A	197.6	2D	628615142	99.01	101	2e-43
RFL_Contig5122_974	IWB64898	2A	197.6	2B	776213656	99.01	101	2e-43
Tdurum_contig14482_1073	IWB68231	2A	197.6	2B	777115685	100	101	3e-45
Tdurum_contig16904_167	IWB68598	2A	197.6	2A	760564730	100	101	3e-45
Tdurum_contig50720_482	IWB72114	2A	197.6	2A	779818555	100	101	3e-45
Tdurum_contig52350_902	IWB72264	2A	197.6	2A	759829924	99.01	101	2e-43
Tdurum_contig53038_684	IWB72299	2A	197.6	2A	758420968	98.02	101	7e-42
Tdurum_contig53038_714	IWB72300	2A	197.6	2A	758420938	98.02	101	7e-42
Tdurum_contig8350_243	IWB73637	2A	197.6	2A	780714779	100	101	3e-45
Tdurum_contig8350_350	IWB73638	2A	197.6	2A	780714672	100	101	3e-45
BS00065245_51	IWB9488	2A	197.6	2A	758389647	99.01	101	2e-43
BS00071350_51	IWB10540	2A	198.7	2A	757918495	99.01	101	2e-43
Excalibur_c39151_104	IWB26001	2A	198.7	2A	757946839	99.01	101	2e-43
BobWhite_c42181_327	IWB3216	2A	198.7	2A	757942824	100	101	3e-45
Kukri_c50116_107	IWB46049	2A	199.1	2A	776214909	98.02	101	7e-42
RAC875_c25513_403	IWB55807	2A	199.2	Un	23679029	99.01	101	2e-43
IAAV881	IWB35543	2A	199.5	2D	651611356	99.48	191	4e-93
Kukri_c16094_799	IWB41523	2A	200.7	Un	31109734	100	101	3e-45
RAC875_c22214_142	IWB55313	2A	200.7	2D	648123872	100	101	3e-45
BS00007689_51	IWB6016	2A	201.1	Un	31209204	99.01	101	2e-43
BS00021937_51	IWB6807	2A	201.1	Un	31113046	98.67	75	5e-29
BS00022252_51	IWB6990	2A	201.1	2A	775619839	99.01	101	2e-43
Tdurum_contig50839_593	IWB72126	2A	201.1	Un	30831056	97.03	101	3e-40
wsnp_JD_c289_450995	IWA5978	2A	204.3	2D	647511456	99.5	201	1e-98
D_GBUVHFX02GKWUA_343	IWB18698	2A	204.3	2D	647813876	98.93	187	9e-89
Tdurum_contig92425_1324	IWB73790	2A	204.3	2A	772373493	98.02	101	7e-42
Tdurum_contig92425_1919	IWB73795	2A	204.3	2A	772372898	100	101	3e-45
Tdurum_contig92425_224	IWB73796	2A	204.3	2A	772374586	100	101	3e-45
Tdurum_contig92425_296	IWB73797	2A	204.3	2A	772374514	99.01	101	2e-43
Tdurum_contig92425_431	IWB73799	2A	204.3	2A	772374386	98.04	102	7e-42
wsnp_BG313362A_Ta_2_1	IWA551	2A	204.7	2D	647279676	99.17	121	2e-54
wsnp_JD_c1872_2603061	IWA5894	2A	204.7	2D	647279539	98.88	178	1e-83
Tdurum_contig21786_270	IWB68948	2A	204.7	2A	773220617	97.03	101	3e-40
Excalibur_c9472_217	IWB29474	2A	205.4	2D	646418434	100	101	3e-45
Excalibur_c73791_215	IWB28691	2A	206.2	2D	645934063	96.04	101	2e-38
Jagger_c2333_93	IWB36488	2A	206.2	2D	645757890	97.26	73	3e-26
Kukri_c18207_262	IWB41918	2A	206.2	7D	47013649	100	101	3e-45
RFL_Contig1115_264	IWB63562	2A	206.2	2B	789601923	99.01	101	2e-43
RFL_Contig5277_1283	IWB64953	2A	206.2	2A	771512463	100	101	3e-45
Tdurum_contig45196_487	IWB71583	2A	206.2	2A	770411323	100	101	3e-45
Tdurum_contig42937_1564	IWB71381	2A	206.5	2A	769497655	99.01	101	2e-43
RAC875_c75800_331	IWB60386	2A	206.8	2A	768998543	100	100	1e-44
Kukri_c49277_476	IWB45970	2A	206.9	2A	769221492	98.99	99	2e-42
Excalibur_c9525_105	IWB29503	2A	207.1	2A	769220303	100	101	3e-45
BS00022467_51	IWB7101	2A	208.4	Un	31530718	99.01	101	2e-43
wsnp_Ex_c3964_7181151	IWA3688	2A	208.7	2A	765710044	99	201	1e-97
BS00082153_51	IWB11240	2A	208.7	Un	31530854	100	101	3e-45
CAP12_rep_c6900_73	IWB13647	2A	208.7	2A	766567284	98.97	97	3e-41
JD_c10324_88	IWB36859	2A	208.7	2A	770008995	99.01	101	2e-43
Kukri_c52608_142	IWB46267	2A	208.7	2B	797627190	99.01	101	2e-43
RAC875_c23769_732	IWB55561	2A	208.7	2D	641948193	99.01	101	2e-43
Tdurum_contig32203_281	IWB70340	2A	208.7	2A	766707837	100	101	3e-45
Tdurum_contig41912_893	IWB70684	2A	208.7	2B	800063235	100	56	4e-20
Tdurum_contig70471_308	IWB73171	2A	208.7	2A	764324185	96.04	101	2e-38
BS00064541_51	IWB9315	2A	208.7	2A	763389780	100	101	3e-45
BS00064544_51	IWB9316	2A	208.7	2A	763389812	98.02	101	3e-41
BS00065380_51	IWB9530	2A	208.7	2A	763832794	99.01	101	2e-43
Tdurum_contig42013_538	IWB70730	2A	208.9	2D	641616396	93.07	101	2e-33
BS00072462_51	IWB10614	2A	209.3	2A	765055845	100	101	3e-45
BobWhite_c18406_110	IWB1174	2A	210.6	2A	762313637	98.91	92	2e-38
BS00095525_51	IWB11937	2A	210.6	2B	795045953	99.01	101	2e-43
IAAV2847	IWB34621	2A	210.6	2B	795066580	98.49	199	3e-94
RAC875_c21405_591	IWB55182	2A	210.6	2B	795064346	100	98	2e-43
RAC875_c35873_1894	IWB57127	2A	210.6	2B	795066925	98.02	101	7e-42
RFL_Contig2972_2285	IWB64155	2A	210.6	2A	761306704	100	101	3e-45
BS00022287_51	IWB7007	2A	210.6	2B	106129335	99.01	101	2e-43
wsnp_Ex_c53729_56868062	IWA4192	2A	210.8	2A	763695130	99	201	1e-97
wsnp_JD_c30_49876	IWA5991	2A	210.8	2A	762288291	100	109	3e-49
wsnp_Ra_c15518_23944753	IWA7638	2A	210.8	2A	762287702	99.5	201	1e-98
BS00094172_51	IWB11856	2A	210.8	2A	762292257	100	101	3e-45
BS00101944_51	IWB12183	2A	210.8	2A	764094109	99.01	101	2e-43
BobWhite_c23689_742	IWB1732	2A	210.8	2A	764658298	97.03	101	3e-40
Ex_c6937_1992	IWB21195	2A	210.8	2A	761540385	99.01	101	2e-43
Ku_c7283_915	IWB39966	2A	210.8	2A	761540638	100	101	3e-45
Kukri_c23400_362	IWB42805	2A	210.8	2A	765710244	100	101	3e-45
Kukri_c365_345	IWB44575	2A	210.8	2B	794049445	93.14	102	6e-33
RAC875_c24364_391	IWB55639	2A	210.8	2A	762291492	100	101	3e-45
RAC875_c24364_526	IWB55640	2A	210.8	2A	762291357	100	101	3e-45
RAC875_c42539_104	IWB57850	2A	210.8	2A	766400263	99.01	101	2e-43
BS00022510_51	IWB7126	2A	210.8	2A	762506508	99.01	101	2e-43
Tdurum_contig60619_283	IWB72749	2A	210.8	2A	761307960	100	101	3e-45
tplb0060e06_1793	IWB75251	2A	210.8	2A	767781858	99.01	101	2e-43
BS00024506_51	IWB7541	2A	210.8	2A	762762677	96.15	104	4e-39
Excalibur_c1999_1178	IWB23406	2A	211.2	2A	762507919	98.98	98	7e-42
Excalibur_c28710_340	IWB24746	2A	211.2	Un	23999036	99.01	101	2e-43
Excalibur_c28710_490	IWB24747	2A	211.2	Un	23998759	96.74	92	3e-35
RAC875_c48891_476	IWB58489	2A	212.5	Un	124962851	100	91	1e-39
Tdurum_contig67879_504	IWB73087	2A	212.5	Un	124963840	99.01	101	2e-43
Tdurum_contig11802_583	IWB67301	2B	0	2D	2478495	98.02	101	7e-42
tplb0054d13_2445	IWB75048	2B	0	2B	9740944	97.33	75	8e-27
BS00099465_51	IWB12069	2B	0.1	2B	10781756	100	101	3e-45
Excalibur_c17250_751	IWB22941	2B	3.1	2B	6263792	98.57	70	3e-26
Excalibur_c39493_251	IWB26054	2B	3.1	2B	6210371	100	101	3e-45
Kukri_rep_c97239_133	IWB50555	2B	3.1	2B	6210207	100	101	3e-45
BS00028028_51	IWB7669	2B	3.1	2B	6253535	98.72	78	1e-30
BS00023068_51	IWB7407	2B	6.6	2B	3300157	100	101	3e-45
BS00084668_51	IWB11379	2B	7.9	2B	1832757	100	101	3e-45
Tdurum_contig4731_552	IWB71788	2B	7.9	5A	445280818	99.01	101	2e-43
BS00027693_51	IWB7661	2B	7.9	2B	2116553	100	101	3e-45
BS00044332_51	IWB8365	2B	7.9	2B	2109772	100	101	3e-45
wsnp_Ex_c1996_3754394	IWA2482	2B	8.3	2B	1330803	99.5	201	1e-98
wsnp_Ex_c326_636368	IWA3407	2B	8.3	Un	177131492	100	146	8e-70
Kukri_c30847_344	IWB43909	2B	8.3	2B	4664197	98.02	101	7e-42
wsnp_Ex_c7776_13247365	IWA4723	2B	8.4	2B	4637455	99.5	201	1e-98
Kukri_c3249_806	IWB44105	2B	8.4	Un	11767347	98.9	91	6e-38
Tdurum_contig76118_145	IWB73347	2B	8.4	2B	4646787	99.01	101	2e-43
BS00081871_51	IWB11217	2B	10.4	2B	12076560	99.01	101	2e-43
BobWhite_c19945_341	IWB1326	2B	10.4	2B	12881111	100	101	3e-45
BS00085748_51	IWB11421	2B	11.6	2B	14046785	98.72	78	1e-30
Kukri_c16758_443	IWB41644	2B	12.2	2B	17389226	99.01	101	2e-43
BS00028092_51	IWB7674	2B	12.2	2B	17394485	100	101	3e-45
wsnp_Ex_c18354_27181086	IWA2303	2B	12.3	2B	16896265	100	119	8e-55
wsnp_Ex_c18354_27181431	IWA2304	2B	12.3	2B	16896002	99	201	5e-97
BS00086125_51	IWB11443	2B	12.3	Un	12635279	100	101	3e-45
Excalibur_c841_609	IWB29097	2B	12.3	2B	17390854	97.03	101	3e-40
RAC875_rep_c69222_996	IWB62546	2B	12.3	2B	17390568	99.01	101	2e-43
Tdurum_contig49144_321	IWB71947	2B	12.3	2B	17390155	98.02	101	7e-42
Tdurum_contig51145_187	IWB72156	2B	12.3	2B	17390780	98.02	101	7e-42
Tdurum_contig51145_476	IWB72157	2B	12.3	2B	17391070	100	101	3e-45
Tdurum_contig54649_915	IWB72375	2B	12.3	2B	16871354	100	72	5e-29
Tdurum_contig93602_268	IWB73884	2B	12.3	2B	17388884	98.02	101	7e-42
BS00043055_51	IWB8328	2B	12.3	2B	16990725	100	101	3e-45
BS00110996_51	IWB12617	2B	12.4	2B	17572503	100	101	3e-45
Excalibur_c42928_135	IWB26388	2B	12.4	2B	17564595	100	101	3e-45
Kukri_c56081_307	IWB46573	2B	12.4	2B	17570842	100	101	3e-45
BS00022298_51	IWB7013	2B	12.4	2B	17572504	100	101	3e-45
Tdurum_contig44328_68	IWB71519	2B	12.4	2B	17778939	100	101	3e-45
wsnp_Ex_c3685_6723631	IWA3589	2B	14.5	2B	18273122	100	116	4e-53
BobWhite_c25359_132	IWB1898	2B	14.5	2D	11823629	100	98	2e-43
Excalibur_c41459_96	IWB26233	2B	14.5	2B	18263033	98.91	92	2e-38
Kukri_c10749_489	IWB40415	2B	14.5	2B	655602146	99.01	101	2e-43
RAC875_c87052_193	IWB60877	2B	14.5	2B	18176511	100	97	6e-43
Tdurum_contig41920_93	IWB70698	2B	15.6	2B	19375229	98.02	101	7e-42
BS00066184_51	IWB9739	2B	15.9	2B	19441441	100	101	3e-45
BS00061979_51	IWB8851	2B	16.1	2B	20077065	99.01	101	2e-43
wsnp_Ex_c3740_6815132	IWA3605	2B	16.3	2B	21951693	100	201	2e-100
wsnp_JD_c10389_11059599	IWA5772	2B	16.3	2B	22724653	99.5	201	1e-98
Excalibur_c26388_776	IWB24437	2B	16.3	2B	21913689	99.01	101	2e-43
Kukri_c23961_636	IWB42892	2B	16.7	2B	21952942	99.01	101	2e-43
RAC875_c63883_76	IWB59815	2B	16.7	2B	21951477	99.01	101	2e-43
BS00070051_51	IWB10435	2B	17.7	2B	24092043	100	101	3e-45
BS00072620_51	IWB10617	2B	17.7	2B	24091970	100	101	3e-45
wsnp_Ex_c19371_28311667	IWA2407	2B	18.5	2B	25017837	98.46	195	4e-92
wsnp_Ra_c4321_7860456	IWA7936	2B	19	2B	24861092	100	149	2e-71
BS00070900_51	IWB10512	2B	19	2B	24510126	99.01	101	2e-43
BS00010318_51	IWB6204	2B	19	2D	13540271	100	101	3e-45
BS00045163_51	IWB8390	2B	19.3	2B	24950812	99.01	101	2e-43
BS00099652_51	IWB12081	2B	19.4	2B	24913682	100	101	3e-45
BS00064706_51	IWB9352	2B	19.4	2A	15881910	100	101	3e-45
BS00002660_51	IWB5813	2B	21.2	2D	13838431	99.01	101	2e-43
Tdurum_contig29563_197	IWB69830	2B	27	2B	28339730	100	101	3e-45
Tdurum_contig29563_257	IWB69831	2B	27	2B	28339790	96.43	84	4e-30
Tdurum_contig64563_491	IWB72990	2B	27	2B	28366609	100	101	3e-45
Tdurum_contig30210_226	IWB69976	2B	27.1	2B	28415893	100	101	3e-45
wsnp_Ex_c1602_3055066	IWA2088	2B	27.6	2B	29039711	100	201	2e-100
wsnp_Ex_c16144_24583060	IWA2104	2B	27.6	2B	29037423	99.5	201	1e-98
wsnp_Ex_c1629_3104356	IWA2112	2B	27.6	2B	29038416	99.28	139	3e-64
wsnp_Ex_c1792_3381544	IWA2275	2B	27.6	2B	29032135	100	201	2e-100
BS00078519_51	IWB11016	2B	27.6	2B	29039082	99.01	101	2e-43
BS00111421_51	IWB12648	2B	27.6	2B	29032000	99.01	101	2e-43
Excalibur_c19585_119	IWB23347	2B	27.6	2B	29039117	99.01	101	2e-43
Excalibur_c19585_169	IWB23348	2B	27.6	2B	29039167	99.01	101	2e-43
Kukri_c48_1058	IWB45833	2B	27.6	2B	29039739	100	88	6e-38
wsnp_Ex_rep_c68623_67474885	IWA5554	2B	27.7	2B	29039317	99	201	1e-97
Kukri_c48_1257	IWB45834	2B	27.7	#N/A	#N/A	#N/A	#N/A	#N/A
Kukri_rep_c104422_192	IWB48989	2B	27.7	2B	29156101	100	101	3e-45
BS00023025_51	IWB7380	2B	27.7	2B	29037489	98.99	99	2e-42
BS00023718_51	IWB7505	2B	27.7	2B	29760106	99.01	101	2e-43
BS00049914_51	IWB8570	2B	27.7	2B	29032772	100	101	3e-45
Excalibur_c13413_165	IWB22268	2B	29	2D	18643836	99.01	101	2e-43
IACX8278	IWB36282	2B	29	2A	19652148	100	198	1e-98
BS00010446_51	IWB6227	2B	29	2B	30497738	100	75	1e-30
RFL_Contig5031_526	IWB64873	2B	29	2B	30496880	100	101	3e-45
Tdurum_contig29819_61	IWB69894	2B	29	2B	30499657	99.01	101	2e-43
Tdurum_contig54634_956	IWB72372	2B	29	2B	30498098	100	101	3e-45
BS00076982_51	IWB10910	2B	30	2B	32871648	99.01	101	2e-43
Kukri_c53810_137	IWB46375	2B	30	2B	31622693	100	99	4e-44
Kukri_c53810_315	IWB46376	2B	30	2B	31622869	96.04	101	4e-39
RAC875_c58425_110	IWB59376	2B	35.3	6B	8781484	100	101	3e-45
wsnp_Ex_c14711_22788263	IWA1929	2B	36.9	2B	41961088	100	201	2e-100
BS00067781_51	IWB10149	2B	36.9	2B	42727711	99.01	101	2e-43
BS00071995_51	IWB10586	2B	36.9	2B	42944320	100	101	3e-45
BS00077914_51	IWB10974	2B	36.9	2B	42281620	100	101	3e-45
BS00109853_51	IWB12436	2B	36.9	2B	42277373	100	80	2e-33
Kukri_c29807_713	IWB43776	2B	36.9	2B	42947320	100	101	3e-45
Kukri_rep_c103893_875	IWB48927	2B	36.9	2B	42953588	100	87	2e-37
RAC875_rep_c105164_545	IWB61421	2B	36.9	2D	27256905	98.46	65	2e-23
wsnp_Ex_c163_320267	IWA2115	2B	37.2	2B	44424645	99.47	190	1e-92
wsnp_Ex_c163_320858	IWA2116	2B	37.2	2B	44426521	100	124	1e-57
wsnp_Ex_c163_321026	IWA2117	2B	37.2	2B	44426740	99.25	134	2e-61
BS00093755_51	IWB11823	2B	37.2	2B	44424386	99.01	101	2e-43
JD_c49544_37	IWB37539	2B	37.2	2B	44360540	96.34	82	4e-29
BobWhite_rep_c63363_160	IWB5373	2B	37.2	2B	43616039	100	101	3e-45
BobWhite_rep_c65082_84	IWB5530	2B	37.2	2B	44352899	100	101	3e-45
RAC875_rep_c79427_59	IWB63153	2B	37.2	2B	44426873	98.81	84	5e-34
IAAV4206	IWB34849	2B	39.9	2B	47430532	100	201	2e-100
RAC875_c12766_461	IWB53589	2B	39.9	2B	47430682	100	101	3e-45
Excalibur_c19260_105	IWB23278	2B	41.9	2D	30747012	97.03	101	1e-40
BS00065276_51	IWB9499	2B	41.9	2B	50412315	99.01	101	2e-43
wsnp_Ex_c10596_17293192	IWA1359	2B	42.8	2D	32189444	97.5	80	8e-30
wsnp_Ex_c10596_17293363	IWA1360	2B	42.8	2B	52874054	100	142	1e-67
wsnp_BF146221B_Ta_2_2	IWA413	2B	42.8	Un	17298137	99.17	121	2e-54
BS00095573_51	IWB11939	2B	42.8	2B	52701829	100	101	3e-45
IAAV3165	IWB34673	2B	42.8	2B	52670426	100	181	2e-89
BS00009807_51	IWB6117	2B	42.8	2B	52670041	97.89	95	2e-38
IACX445	IWB35959	2B	43.9	2B	52872996	98.1	105	1e-44
Kukri_c16479_765	IWB41589	2B	43.9	2B	54778713	100	101	3e-45
Tdurum_contig51706_1758	IWB72205	2B	44.5	2B	54530725	98.7	77	4e-30
Tdurum_contig51706_157	IWB72204	2B	44.7	2B	54533155	100	101	3e-45
BobWhite_c30988_361	IWB2412	2B	44.8	2D	34983882	99.01	101	2e-43
Excalibur_c4349_1050	IWB26451	2B	44.8	2B	57654467	98.02	101	6e-43
BobWhite_c3448_80	IWB2702	2B	44.8	2B	57651467	100	61	6e-23
Kukri_c26288_419	IWB43273	2B	45.1	2B	56784909	100	101	3e-45
Tdurum_contig54704_176	IWB72380	2B	45.1	2B	58325058	99.01	101	2e-43
wsnp_BG275030A_Td_2_1	IWA546	2B	45.7	2B	58668135	96.84	95	2e-37
BobWhite_c41535_52	IWB3178	2B	45.7	2B	58979394	100	101	3e-45
Tdurum_contig4899_1075	IWB71940	2B	45.7	1D	56753106	95.05	101	8e-37
Tdurum_contig7495_799	IWB73254	2B	45.7	#N/A	#N/A	#N/A	#N/A	#N/A
Kukri_c5497_312	IWB46469	2B	45.8	2A	38914320	98.77	81	2e-32
Ra_c19690_1998	IWB51371	2B	46.6	2D	36794331	100	90	4e-39
RAC875_c26469_480	IWB55936	2B	48.1	2B	65100804	98.61	72	2e-27
BS00096182_51	IWB11952	2B	48.2	2B	65370433	99.01	101	2e-43
RAC875_c26469_363	IWB55935	2B	48.2	2B	65100921	99.01	101	2e-43
RAC875_c34516_70	IWB56962	2B	48.2	2B	65375213	99.01	101	2e-43
RAC875_c61801_299	IWB59624	2B	48.2	2B	65107046	100	101	3e-45
BobWhite_c11739_325	IWB256	2B	48.4	2B	66544201	99.01	101	2e-43
Tdurum_contig27976_414	IWB69396	2B	48.4	2B	66543478	99.01	101	2e-43
Kukri_rep_c107572_121	IWB49277	2B	50.2	2B	68365389	98.82	85	1e-34
Tdurum_contig45255_3473	IWB71586	2B	51.8	2B	69410809	100	101	3e-45
Tdurum_contig94176_65	IWB73904	2B	51.8	2B	71292465	100	101	3e-45
Tdurum_contig5056_173	IWB72086	2B	52.1	2B	69650730	99.01	101	2e-43
Excalibur_c108170_294	IWB21742	2B	53	2D	45679378	99.01	101	2e-43
Tdurum_contig48451_735	IWB71896	2B	53.4	2D	46297429	99.01	101	2e-43
Tdurum_contig61293_131	IWB72776	2B	53.6	2B	73989749	100	101	3e-45
BobWhite_c27887_69	IWB2150	2B	55.3	2D	52232151	99.02	102	2e-43
Excalibur_c20058_339	IWB23422	2B	55.3	2B	76817160	100	101	3e-45
Excalibur_rep_c101660_546	IWB29747	2B	55.3	2B	77172569	100	101	3e-45
Jagger_c8098_88	IWB36769	2B	55.3	2B	76916756	100	101	3e-45
Tdurum_contig29620_125	IWB69852	2B	55.3	2B	77173098	100	101	3e-45
Tdurum_contig54373_1003	IWB72350	2B	55.3	2B	80630472	99.01	101	2e-43
Tdurum_contig74936_133	IWB73248	2B	55.3	2B	77290671	99.01	101	2e-43
Tdurum_contig74936_218	IWB73249	2B	55.3	2B	77290756	100	101	3e-45
Tdurum_contig74936_264	IWB73250	2B	55.3	2B	77290802	98.02	101	7e-42
Tdurum_contig74936_387	IWB73251	2B	55.3	2B	77290925	100	101	3e-45
Tdurum_contig74936_456	IWB73252	2B	55.3	2B	77290994	99.01	101	2e-43
Tdurum_contig7526_301	IWB73263	2B	55.3	2B	77170064	99.01	101	2e-43
Tdurum_contig54373_163	IWB72351	2B	56.4	2B	80636679	100	101	3e-45
Tdurum_contig54373_449	IWB72352	2B	56.4	2B	80631026	99.01	101	2e-43
Excalibur_c6097_2208	IWB28003	2B	57.7	2B	87354961	99.01	101	2e-43
Kukri_c12627_150	IWB40865	2B	57.7	2D	54673704	100	101	3e-45
Kukri_rep_c69288_529	IWB49878	2B	57.7	2B	87350855	100	101	3e-45
RAC875_c86069_65	IWB60831	2B	59.1	2B	91547508	100	101	3e-45
Excalibur_rep_c68899_191	IWB31002	2B	59.3	2B	91837847	99.01	101	2e-43
JD_c11869_1297	IWB36919	2B	59.3	2B	91837818	99.01	101	2e-43
Tdurum_contig47202_1699	IWB71775	2B	59.3	2B	91837747	99.01	101	2e-43
BS00022966_51	IWB7346	2B	59.6	2B	92996952	99.01	101	2e-43
IACX6223	IWB36124	2B	59.7	2B	93409707	98.91	92	1e-38
IACX2309	IWB35850	2B	60	2B	95797417	99.17	120	6e-54
Tdurum_contig60978_352	IWB72760	2B	60	2B	94192833	100	101	3e-45
Tdurum_contig62458_179	IWB72894	2B	60	2B	94033108	98.02	101	7e-42
BS00067337_51	IWB10024	2B	60.1	2B	97188852	100	101	3e-45
CAP7_c1018_75	IWB13691	2B	60.1	2B	97442081	100	101	3e-45
Tdurum_contig28227_304	IWB69462	2B	60.1	2A	62369214	98.02	101	7e-42
BobWhite_c5511_323	IWB3877	2B	60.5	2B	97952822	100	101	3e-45
wsnp_JD_c12687_12877994	IWA5818	2B	64	2B	99759578	99.5	201	1e-98
BS00038217_51	IWB8125	2B	64	2B	99961034	100	101	3e-45
BS00038218_51	IWB8126	2B	64	2B	99961038	99.01	101	2e-43
wsnp_Ex_c5239_9272511	IWA4135	2B	65.2	2B	102977649	100	201	2e-100
Kukri_c49522_254	IWB45998	2B	65.2	2D	67225699	99.01	101	2e-43
Tdurum_contig81323_527	IWB73496	2B	65.2	2D	67233659	98.68	76	1e-29
BS00071690_51	IWB10568	2B	65.8	2B	105375830	100	101	3e-45
BS00079213_51	IWB11072	2B	65.8	2B	104237363	100	101	3e-45
RFL_Contig4542_1281	IWB64716	2B	65.8	2D	66761394	100	101	3e-45
Tdurum_contig7800_228	IWB73437	2B	65.8	2B	105375568	100	101	3e-45
Tdurum_contig81323_291	IWB73495	2B	65.8	2B	104237463	100	101	3e-45
Tdurum_contig82821_324	IWB73598	2B	67.2	2B	105909294	99.01	101	2e-43
Ku_c2387_1855	IWB38875	2B	70.1	2B	122265805	99.01	101	2e-43
Kukri_c2387_2011	IWB42880	2B	70.1	2B	122265649	100	101	3e-45
Tdurum_contig77602_931	IWB73426	2B	70.7	2B	120589962	100	97	6e-43
BS00083078_51	IWB11285	2B	71	2B	131130420	99.01	101	2e-43
BS00067845_51	IWB10168	2B	72	6D	84935734	99.01	101	2e-43
Ku_c23446_2209	IWB38861	2B	72.1	2B	133009154	100	101	3e-45
Tdurum_contig83066_276	IWB73607	2B	72.1	2B	133689943	99.01	101	2e-43
BS00063577_51	IWB9085	2B	72.1	2B	132518481	100	101	3e-45
BS00088575_51	IWB11568	2B	72.2	2B	135003836	99.01	101	2e-43
Jagger_c4412_265	IWB36600	2B	73.2	2B	136430532	99.01	101	2e-43
RAC875_rep_c72435_90	IWB62870	2B	73.2	2D	84342633	99.01	101	2e-43
wsnp_Ku_c28266_38201643	IWA6838	2B	73.7	2B	139814904	98.67	150	3e-69
Kukri_c7139_6288	IWB47512	2B	73.7	2D	87248065	100	101	3e-45
IAAV6994	IWB35283	2B	74.2	2B	144431499	99.5	201	1e-98
RAC875_rep_c118376_304	IWB62466	2B	74.2	2B	143774001	100	101	3e-45
RFL_Contig1139_602	IWB63569	2B	74.2	2B	148589846	100	101	3e-45
JD_c2280_91	IWB37206	2B	74.3	2B	144602984	98.02	101	7e-42
Kukri_rep_c109981_150	IWB49427	2B	74.4	2A	90763826	100	84	1e-35
wsnp_CAP12_rep_c4678_2134259	IWA1010	2B	74.5	2B	146634873	99.5	201	3e-99
Excalibur_c23185_155	IWB23924	2B	74.5	2B	140750203	99.02	102	2e-43
RAC875_c2110_117	IWB55126	2B	74.5	2B	146736270	97.03	101	3e-40
wsnp_Ex_c13351_21042379	IWA1763	2B	75.4	2B	150707667	100	201	2e-100
wsnp_Ra_c16822_25566950	IWA7661	2B	75.4	2B	153762019	99.5	201	1e-98
D_GA8KES402HPK9H_258	IWB17890	2B	75.4	2D	102542002	98.8	250	2e-122
RAC875_c47353_350	IWB58343	2B	75.4	2B	153859827	100	101	3e-45
RAC875_rep_c74590_606	IWB63032	2B	75.4	2B	157693888	97.03	101	3e-40
RFL_Contig1483_1765	IWB63655	2B	75.4	2B	151644926	100	101	3e-45
Tdurum_contig18197_86	IWB68715	2B	75.4	2B	152712590	100	101	3e-45
RAC875_c1226_652	IWB53512	2B	77.2	2B	157693534	99.01	101	2e-43
BS00040251_51	IWB8214	2B	77.2	2B	154911150	100	83	3e-35
BS00092275_51	IWB11751	2B	78.7	2B	158624711	100	101	3e-45
RAC875_c7827_218	IWB60513	2B	80	2D	111347498	100	73	1e-29
BS00035894_51	IWB8031	2B	80.6	2B	164107384	99.01	101	2e-43
Tdurum_contig31263_473	IWB70204	2B	81.7	2A	117387816	100	101	3e-45
wsnp_Ex_c16582_25102216	IWA2151	2B	82.8	2B	174345568	98.75	160	8e-74
wsnp_Ex_c5943_10422207	IWA4388	2B	82.8	2D	120093422	100	110	8e-50
IAAV2018	IWB34490	2B	82.8	2B	168622435	100	191	8e-95
Kukri_rep_c102367_278	IWB48765	2B	82.8	2B	171024980	100	101	3e-45
wsnp_Ex_c51461_55394646	IWA4102	2B	84	2B	177650057	99.5	201	1e-98
BobWhite_c7786_376	IWB4384	2B	84	2D	126950255	99.01	101	2e-43
BobWhite_c948_52	IWB4614	2B	84.6	2B	180616389	100	98	2e-43
wsnp_Ex_c33246_41764093	IWA3428	2B	85.3	2B	182013553	99.5	201	1e-98
wsnp_Ex_rep_c101906_87187119	IWA5038	2B	85.3	2B	182012195	99.5	201	1e-98
wsnp_JD_c6350_7517130	IWA6136	2B	85.3	2B	182360937	99.36	157	8e-75
BS00091007_51	IWB11686	2B	85.3	2B	183262686	100	101	3e-45
Kukri_c10054_567	IWB40225	2B	85.3	2D	128399271	99.01	101	2e-43
Kukri_rep_c94009_116	IWB50518	2B	85.3	2B	182361087	99.01	101	2e-43
BS00043103_51	IWB8334	2B	85.3	2B	183200519	97.03	101	3e-40
wsnp_CAP7_c2233_1085003	IWA1059	2B	85.8	2B	190658437	98.63	146	5e-66
wsnp_BF291736B_Ta_1_1	IWA439	2B	85.8	2B	192440664	100	121	3e-56
wsnp_Ku_c18923_28319203	IWA6664	2B	85.8	2B	189597877	99	201	1e-97
Ex_c8832_2521	IWB21403	2B	85.8	2B	190016045	99.01	101	2e-43
Excalibur_c44495_105	IWB26554	2B	85.8	2B	184118467	99.01	101	2e-43
IAAV1296	IWB34350	2B	85.8	2B	190658582	99.32	148	3e-69
Jagger_c9472_305	IWB36818	2B	85.8	2B	195664068	100	73	8e-30
Ku_c4777_2494	IWB39509	2B	85.8	2B	185760795	99.01	101	2e-43
Kukri_c39230_362	IWB44901	2B	85.8	Un	302456397	97.03	101	3e-40
RAC875_c97988_87	IWB61226	2B	85.8	Un	302456019	98.02	101	7e-42
RAC875_c8045_231	IWB60612	2B	87.3	2B	199763124	97.09	103	1e-40
RAC875_c17331_129	IWB54447	2B	87.4	2B	202917872	98.02	101	7e-42
RFL_Contig5290_1493	IWB64964	2B	87.4	2B	200385432	99.01	101	2e-43
wsnp_BE445278B_Ta_2_1	IWA169	2B	87.6	2B	209097051	98.35	121	2e-53
wsnp_Ex_c7003_12065828	IWA4606	2B	87.7	2B	210259611	100	201	2e-100
BS00078506_51	IWB11014	2B	87.7	2B	210842836	100	101	3e-45
RAC875_c46661_184	IWB58269	2B	87.7	2B	209253060	99.01	101	2e-43
wsnp_CAP11_c5474_2542512	IWA776	2B	88.4	2B	210652084	98.44	128	4e-56
CAP7_c7349_21	IWB14239	2B	88.4	2D	152627383	97.1	69	3e-24
CAP8_c3982_23	IWB14712	2B	88.4	2D	152627380	97.22	72	6e-26
BS00065558_51	IWB9584	2B	88.4	2B	210455849	99.01	101	2e-43
RFL_Contig356_812	IWB64392	2B	89.5	2B	212943664	99.01	101	2e-43
Kukri_rep_c68124_169	IWB49755	2B	89.7	2D	159327323	98.89	90	2e-37
Kukri_rep_c68124_672	IWB49756	2B	89.7	2B	216463224	100	101	3e-45
Tdurum_contig50509_805	IWB72081	2B	89.7	2B	216467603	100	100	1e-44
Excalibur_c32337_110	IWB25197	2B	90.2	2B	229444022	99.01	101	2e-43
Excalibur_c5691_2088	IWB27685	2B	90.2	2B	228981101	100	92	3e-40
BobWhite_c3664_81	IWB2856	2B	90.2	2D	170451262	99.01	101	6e-43
BobWhite_c6472_601	IWB4174	2B	90.2	2B	229443763	100	101	3e-45
CAP7_c3814_303	IWB14055	2B	90.8	2D	176163468	100	66	1e-25
BS00066546_51	IWB9834	2B	90.8	2B	233268476	98.63	73	6e-28
BS00072379_51	IWB10611	2B	92.4	2B	249198797	99.01	101	2e-43
Kukri_c3096_1411	IWB43921	2B	93.2	2B	313481328	100	101	3e-45
wsnp_Ex_c4218_7618252	IWA3817	2B	93.3	2B	363979343	99.5	201	1e-98
wsnp_Ex_c1541_2943791	IWA2025	2B	93.7	2B	389410379	99.5	201	1e-98
wsnp_BE488220B_Ta_1_1	IWA207	2B	93.7	2B	386286731	100	121	3e-56
wsnp_Ex_c42447_49025091	IWA3828	2B	93.7	2B	386313562	99.5	201	1e-98
wsnp_Ex_c7347_12594320	IWA4660	2B	93.7	2B	388104882	99.5	201	1e-98
wsnp_Ex_c7947_13490279	IWA4751	2B	93.7	2B	383279837	99	201	1e-97
wsnp_Ex_c7947_13490335	IWA4752	2B	93.7	2B	383279893	99.5	201	3e-99
wsnp_Ex_c9133_15198596	IWA4879	2B	93.7	2B	389472710	99.5	201	1e-98
BS00076369_51	IWB10875	2B	93.7	2B	381795078	100	101	3e-45
Excalibur_c85610_72	IWB29145	2B	93.7	2B	381914247	99.01	101	2e-43
IAAV3148	IWB34671	2B	93.7	2B	390363084	99.5	201	3e-99
Ku_c14843_504	IWB38467	2B	93.7	2B	385201964	99.02	102	2e-43
BS00062485_51	IWB8863	2B	93.7	2B	382083955	98.96	96	1e-40
wsnp_Ex_c26375_35620271	IWA3045	2B	94.2	2B	417080173	99.5	201	1e-98
Ex_c66545_1078	IWB21074	2B	94.2	2B	413866200	99.01	101	2e-43
tplb0038f13_1219	IWB74647	2B	94.2	2B	417080323	99.01	101	2e-43
wsnp_JD_c21530_18862705	IWA5927	2B	95.2	2B	424331770	99.21	126	5e-57
wsnp_Ex_rep_c104478_89183627	IWA5117	2B	96.2	2B	447821283	99.28	139	3e-64
wsnp_Ex_c28243_37383894	IWA3153	2B	96.5	2B	442791288	99.43	174	1e-83
wsnp_JD_c9251_10121113	IWA6215	2B	96.5	2B	442796555	98.77	163	6e-76
wsnp_CAP11_c1956_1045077	IWA697	2B	96.5	2B	445177733	100	114	5e-52
IAAV3255	IWB34687	2B	96.5	2B	442522626	100	77	2e-31
Kukri_c47082_109	IWB45726	2B	96.5	2B	442514812	97.3	74	8e-27
Kukri_rep_c91092_72	IWB50491	2B	96.5	2B	442796096	97.03	101	3e-40
CAP12_c6259_207	IWB13486	2B	96.9	2B	442794748	99.01	101	2e-43
BobWhite_rep_c50998_607	IWB4921	2B	96.9	2A	508072298	99.01	101	2e-43
wsnp_Ex_c25438_34703568	IWA2972	2B	100	2B	450184371	99.5	201	1e-98
Kukri_c20819_497	IWB42378	2B	100.2	2B	450184221	99.01	101	2e-43
RAC875_c3039_101	IWB56465	2B	100.2	2B	450181285	99.01	101	2e-43
wsnp_be499362B_Td_2_1	IWA326	2B	100.7	2B	476407974	100	121	3e-56
CAP8_c6219_239	IWB14855	2B	100.7	2B	476406283	100	66	1e-25
BobWhite_c27816_523	IWB2143	2B	100.7	2B	459575922	99.01	101	2e-43
Excalibur_c99477_90	IWB29666	2B	100.7	2B	456176969	98.04	102	7e-42
BobWhite_c7326_70	IWB4321	2B	100.7	2B	456172645	100	101	3e-45
Ra_c21042_617	IWB51413	2B	100.7	2B	456025580	100	101	3e-45
Tdurum_contig13223_701	IWB67903	2B	100.7	2B	476415616	99.01	101	2e-43
wsnp_Ex_c17576_26303707	IWA2236	2B	100.9	2B	458849995	99.5	201	1e-98
wsnp_BG608232B_Ta_2_1	IWA586	2B	100.9	2B	453267417	99.17	121	2e-54
wsnp_BG608232B_Ta_2_2	IWA587	2B	100.9	2B	453267322	99.17	121	2e-54
wsnp_JD_c352_546108	IWA6016	2B	100.9	2B	453265044	100	201	2e-100
wsnp_JD_c9810_10594505	IWA6240	2B	100.9	2B	458244807	99.35	155	4e-73
wsnp_Ku_c39797_48152615	IWA7015	2B	100.9	2B	460805142	100	170	3e-83
wsnp_Ku_c58640_61287250	IWA7195	2B	100.9	2B	456176478	99.47	187	2e-91
wsnp_Ra_c18396_27453775	IWA7684	2B	100.9	2B	461980766	99.42	171	5e-82
BobWhite_c31986_324	IWB2507	2B	100.9	2B	457684422	99.01	101	2e-43
Kukri_c22002_793	IWB42581	2B	100.9	2D	386493340	98.97	97	3e-41
tplb0028k07_1268	IWB74340	2B	103	2B	485040302	100	101	3e-45
BobWhite_c21705_196	IWB1518	2B	103.5	2D	422080879	98.48	66	5e-24
RAC875_c14602_516	IWB53952	2B	105.7	2B	510399062	99.01	101	2e-43
wsnp_Ex_c25217_34481787	IWA2955	2B	108.2	2B	542759343	99.5	201	1e-98
CAP11_c1476_128	IWB12692	2B	108.2	2B	543704883	99.01	101	2e-43
Ku_c6050_678	IWB39706	2B	108.9	2B	529102960	98.53	68	4e-25
RAC875_c57842_264	IWB59315	2B	108.9	2B	529262870	99.01	101	2e-43
Tdurum_contig27880_75	IWB69363	2B	108.9	2B	530098759	100	101	3e-45
wsnp_Ex_c8894_14858193	IWA4853	2B	109.2	2B	540425087	100	201	2e-100
Excalibur_c29734_1152	IWB24879	2B	109.2	2B	539961970	98.7	77	2e-30
Excalibur_c419_65	IWB26285	2B	109.2	2D	458667033	98.02	101	7e-42
Ku_c68762_669	IWB39834	2B	109.2	2D	461841274	99.01	101	2e-43
Tdurum_contig27828_177	IWB69329	2B	109.2	2B	539649202	98.02	101	7e-42
wsnp_Ku_c4004_7311479	IWA7019	2B	109.4	2B	543529839	100	201	2e-100
Kukri_c25281_99	IWB43105	2B	109.4	2B	541088654	100	101	3e-45
wsnp_Ex_c20169_29215401	IWA2512	2B	113.2	2B	553628591	99.5	201	1e-98
IAAV211	IWB34502	2B	113.8	2B	553613870	99.5	201	1e-98
RFL_Contig4718_1323	IWB64779	2B	113.8	2B	553623424	100	101	3e-45
Tdurum_contig26542_457	IWB69271	2B	114.4	2B	554292581	99.01	101	2e-43
RFL_Contig1987_3440	IWB63790	2B	114.6	2B	555840884	99.01	101	2e-43
Tdurum_contig25602_212	IWB69139	2B	114.6	2B	555856076	100	101	3e-45
Tdurum_contig11730_153	IWB67261	2B	115	2B	558290469	98.02	101	7e-42
Tdurum_contig25629_415	IWB69151	2B	115.5	2A	631858161	99.01	101	2e-43
wsnp_Ex_c114_229879	IWA1488	2B	118.7	2B	580019987	99.5	201	1e-98
IAAV5350	IWB35013	2B	119.4	2B	592584090	100	201	2e-100
RAC875_c56111_61	IWB59172	2B	119.5	2B	585892077	100	101	3e-45
RAC875_c76019_179	IWB60397	2B	119.5	2D	166199492	99.01	101	2e-43
RFL_Contig4856_71	IWB64817	2B	119.5	2B	586120586	100	101	3e-45
BS00035335_51	IWB8009	2B	119.6	2B	591915716	99.01	101	2e-43
BS00093992_51	IWB11848	2B	120.2	2B	595126879	100	101	3e-45
IAAV717	IWB35303	2B	120.2	2B	592585054	100	199	3e-99
BS00019285_51	IWB6667	2B	120.2	2B	592585198	100	97	6e-43
BS00022800_51	IWB7263	2B	120.2	2B	595126605	97.03	101	3e-40
BS00064448_51	IWB9286	2B	120.2	2B	592039350	100	101	3e-45
wsnp_Ex_rep_c67543_66165372	IWA5411	2B	121.2	2B	593675030	99.22	128	4e-58
wsnp_Ex_c26281_35525243	IWA3035	2B	121.5	2B	606038508	100	201	2e-100
wsnp_Ex_c26281_35525999	IWA3037	2B	121.5	2B	606040585	100	161	4e-78
Kukri_rep_c70870_919	IWB50067	2B	121.5	2D	514341673	99.01	101	6e-43
wsnp_Ex_c17127_25756019	IWA2189	2B	122.2	2D	515826024	100	122	2e-56
Ex_c55735_1012	IWB20922	2B	122.2	2B	605000624	96.77	62	4e-20
Ra_c6367_387	IWB52361	2B	122.2	2B	608231118	99.01	101	2e-43
wsnp_Ku_c12037_19549078	IWA6453	2B	123.4	2B	611065428	96.52	201	5e-92
Kukri_c31165_835	IWB43954	2B	123.4	2B	608942389	100	101	3e-45
RAC875_c14316_584	IWB53902	2B	124.4	2B	612686336	99.01	101	2e-43
Excalibur_c16532_499	IWB22798	2B	124.5	6B	465880883	98.02	101	3e-41
Ex_c2510_477	IWB20275	2B	124.9	2D	520040794	100	101	3e-45
JG_c2092_196	IWB37941	2B	124.9	2B	620594778	98.48	66	2e-24
Tdurum_contig31414_100	IWB70242	2B	124.9	2B	616927141	98.53	68	4e-25
Tdurum_contig65349_140	IWB73022	2B	124.9	2B	622918495	100	101	3e-45
Tdurum_contig66317_77	IWB73040	2B	124.9	2B	621185438	100	100	1e-44
wsnp_Ex_c46576_52042185	IWA3973	2B	126.6	2B	632920784	97.51	201	5e-92
wsnp_JD_c47318_32176833	IWA6076	2B	126.6	2B	632920983	93.53	201	3e-79
BS00070861_51	IWB10507	2B	126.6	2B	635075995	99.01	101	2e-43
Ex_c960_746	IWB21466	2B	126.6	2B	634203315	100	101	3e-45
Ex_c960_776	IWB21467	2B	126.6	2B	634203285	100	101	3e-45
IAAV9183	IWB35602	2B	126.6	2B	635199305	99.5	201	1e-98
BS00012071_51	IWB6524	2B	126.6	2B	635023634	100	101	3e-45
Tdurum_contig41947_720	IWB70706	2B	126.6	6A	583814562	100	101	3e-45
Tdurum_contig7144_602	IWB73199	2B	126.6	2B	635206971	99.01	101	2e-43
Tdurum_contig7144_248	IWB73198	2B	126.7	2B	635206617	99.01	101	2e-43
Kukri_c693_87	IWB47474	2B	126.9	2B	636112803	100	101	3e-45
Kukri_c20930_159	IWB42398	2B	127.6	2B	640103336	96.94	98	2e-38
Ra_c4051_1010	IWB52020	2B	127.6	2B	638261949	99.01	101	2e-43
RAC875_c9691_870	IWB61174	2B	127.6	Un	22154071	100	101	3e-45
RFL_Contig337_1432	IWB64321	2B	127.6	2B	637574187	100	101	3e-45
RFL_Contig337_1645	IWB64322	2B	127.6	2B	637574400	100	101	3e-45
Tdurum_contig46389_1459	IWB71677	2B	127.6	3B	29356246	100	101	3e-45
Tdurum_contig54925_202	IWB72407	2B	127.6	2B	637574500	100	101	3e-45
Tdurum_contig54925_291	IWB72409	2B	127.6	2B	637574411	99.01	101	2e-43
Tdurum_contig54925_358	IWB72410	2B	127.6	2B	637574344	99.01	101	2e-43
Tdurum_contig54925_415	IWB72411	2B	127.6	2B	637574287	100	101	3e-45
wsnp_Ex_c24711_33964543	IWA2924	2B	128	2B	640341116	99	201	1e-97
BobWhite_c19554_544	IWB1288	2B	128	2D	536151087	98.98	98	7e-42
CAP7_rep_c5636_102	IWB14419	2B	128	2B	640103046	96.04	101	6e-38
CAP7_rep_c5636_213	IWB14420	2B	128	2B	640103156	100	101	3e-45
Ex_c24711_1153	IWB20255	2B	128	2B	640341213	100	101	3e-45
Tdurum_contig82770_296	IWB73594	2B	128	2B	639525261	99.01	101	2e-43
BS00041922_51	IWB8295	2B	128	2B	640489998	99.01	101	2e-43
BS00105315_51	IWB12239	2B	128.3	2B	641877232	100	101	3e-45
IAAV5674	IWB35071	2B	128.4	2A	683516503	99.5	201	1e-98
Kukri_c1460_1032	IWB41234	2B	128.4	2B	644151605	100	101	3e-45
Tdurum_contig28711_194	IWB69598	2B	128.4	2B	644150446	100	101	3e-45
Excalibur_c71500_231	IWB28591	2B	129.5	2B	648482684	100	101	3e-45
wsnp_Ex_c17845_26604587	IWA2261	2B	129.8	2B	650285204	100	74	8e-30
wsnp_BF473744B_Ta_2_2	IWA470	2B	129.8	2B	648081955	100	121	3e-56
Kukri_c4294_371	IWB45296	2B	129.8	2B	648920802	99.01	101	2e-43
BobWhite_c23046_293	IWB1661	2B	130.1	2B	658606103	99.01	101	2e-43
Kukri_c7666_746	IWB47695	2B	130.1	2D	552185480	99.01	101	2e-43
Tdurum_contig10380_278	IWB66493	2B	130.1	2D	544879789	99.01	101	2e-43
Tdurum_contig12459_491	IWB67608	2B	130.1	2B	651932497	100	101	3e-45
Tdurum_contig35408_205	IWB70540	2B	130.1	2B	651363071	99.01	101	2e-43
Tdurum_contig51168_326	IWB72164	2B	130.1	2B	651358829	99.01	101	2e-43
Tdurum_contig74826_330	IWB73241	2B	130.1	2B	652613113	100	101	3e-45
Tdurum_contig84620_175	IWB73669	2B	130.1	2B	653620484	100	97	6e-43
Tdurum_contig22828_244	IWB68982	2B	130.5	2B	653914389	99.01	101	2e-43
Tdurum_contig25423_72	IWB69070	2B	130.6	2B	653914672	99.01	101	2e-43
Excalibur_c7755_175	IWB28851	2B	130.9	2B	655607047	100	101	3e-45
BS00105409_51	IWB12242	2B	131.2	2B	655014378	100	101	3e-45
Excalibur_c25414_806	IWB24309	2B	131.2	2B	656228527	100	101	3e-45
IAAV7841	IWB35393	2B	131.2	2B	657790778	99.5	201	1e-98
Kukri_c3024_1163	IWB43828	2B	131.2	2D	552141403	99.01	101	2e-43
Kukri_c3024_1268	IWB43829	2B	131.2	2D	552141298	99.01	101	2e-43
Kukri_c49007_501	IWB45932	2B	131.2	2B	658615115	98.02	101	7e-42
BS00010567_51	IWB6244	2B	131.2	2B	657195945	98.86	88	3e-36
RAC875_rep_c91134_949	IWB63291	2B	131.2	2D	552194517	99	100	6e-43
wsnp_Ex_c10796_17575074	IWA1389	2B	131.6	2B	660461088	100	106	1e-47
wsnp_Ex_c922_1775246	IWA4890	2B	131.6	2B	661777090	99.5	201	1e-98
wsnp_Ex_c9628_15927045	IWA4948	2B	131.6	2B	660156581	99.5	201	1e-98
wsnp_Ex_rep_c102385_87568304	IWA5064	2B	131.6	2A	694954205	99.5	201	1e-98
BS00079013_51	IWB11045	2B	131.6	2B	660114513	99.01	101	2e-43
BobWhite_c12134_1140	IWB309	2B	131.6	2B	660465947	99.01	101	2e-43
RAC875_c3947_441	IWB57521	2B	131.6	2B	660461011	100	78	2e-32
Tdurum_contig10237_356	IWB66389	2B	131.6	2D	554434054	100	101	3e-45
Excalibur_rep_c108225_302	IWB30332	2B	132.2	7B	692834330	98.82	85	1e-34
wsnp_Ex_c32493_41138957	IWA3395	2B	132.3	2B	664213776	100	179	4e-88
BS00098739_51	IWB12045	2B	132.3	2B	664214120	99.01	101	2e-43
Kukri_c49010_266	IWB45933	2B	132.3	2B	664219495	100	101	3e-45
Kukri_rep_c112754_101	IWB49572	2B	132.3	2B	664213626	100	101	3e-45
RAC875_rep_c73777_410	IWB62974	2B	132.3	2A	696923077	97.89	95	2e-38
BS00011545_51	IWB6433	2B	132.3	2B	664219758	100	101	3e-45
BS00011579_51	IWB6438	2B	132.3	2A	696923122	99.01	101	2e-43
Tdurum_contig68666_570	IWB73114	2B	132.3	2B	664214088	100	101	3e-45
BobWhite_c5543_492	IWB3891	2B	132.5	2B	664934794	99.01	101	2e-43
wsnp_Ex_c58274_59638635	IWA4356	2B	132.6	2B	665669165	100	201	2e-100
wsnp_Ex_c58274_59638884	IWA4357	2B	132.6	2B	665669414	99.5	201	1e-98
wsnp_Ra_rep_c109853_92677055	IWA8141	2B	132.6	2B	664220975	99.5	201	1e-98
BobWhite_c22106_204	IWB1556	2B	132.6	2B	665189342	99.01	101	2e-43
RAC875_c14039_299	IWB53839	2B	132.6	2B	665668904	100	101	3e-45
Tdurum_contig59522_262	IWB72650	2B	132.6	2B	665189703	99.01	101	2e-43
Tdurum_contig59522_420	IWB72651	2B	132.6	2B	665189442	99.01	101	2e-43
BobWhite_rep_c64679_73	IWB5492	2B	132.8	2B	666649974	100	101	3e-45
Tdurum_contig55801_1012	IWB72474	2B	132.8	2B	667280330	99.01	101	2e-43
BS00022518_51	IWB7131	2B	133.3	2B	670837387	99.01	101	2e-43
tplb0049b10_696	IWB74926	2B	133.9	2B	671742689	98.77	81	2e-32
BS00059115_51	IWB8768	2B	133.9	2B	672635946	99.01	101	2e-43
Tdurum_contig70510_462	IWB73172	2B	134	2B	672746109	99.01	101	2e-43
BobWhite_c47573_560	IWB3603	2B	134.8	2B	673961526	99.01	101	2e-43
BS00046166_51	IWB8421	2B	134.8	2B	673982467	98.02	101	7e-42
Excalibur_c64983_65	IWB28337	2B	135.2	2B	675345817	100	101	3e-45
BobWhite_c1072_100	IWB102	2B	135.8	2B	677218348	97.03	101	1e-39
Excalibur_rep_c77221_93	IWB31274	2B	136.6	2D	568231087	99.01	101	2e-43
BS00022335_51	IWB7034	2B	137.2	2B	682859798	99.01	101	2e-43
wsnp_Ex_c12922_20472434	IWA1707	2B	137.9	2B	690029276	99.13	115	2e-50
wsnp_Ex_c5619_9884202	IWA4294	2B	137.9	2B	689871669	99.5	201	1e-98
wsnp_Ex_rep_c71983_70544041	IWA5733	2B	137.9	2A	709836910	100	201	2e-100
wsnp_Ku_c52392_57380726	IWA7149	2B	137.9	2A	709837110	100	201	2e-100
BS00105171_51	IWB12237	2B	137.9	2A	711979403	98.82	85	1e-34
CAP8_rep_c6372_264	IWB15055	2B	137.9	2B	688462692	98.02	101	7e-42
BobWhite_c22728_78	IWB1631	2B	137.9	2D	571073834	96.15	78	2e-27
Excalibur_c26483_387	IWB24444	2B	137.9	2B	685746174	100	101	3e-45
Excalibur_c40976_111	IWB26189	2B	137.9	2D	571077855	98.88	89	8e-37
IAAV5307	IWB35003	2B	137.9	2A	709775610	99.5	201	1e-98
IACX5919	IWB36062	2B	137.9	2A	709836654	97.5	120	1e-50
JD_c2156_2040	IWB37190	2B	137.9	2D	571081094	100	101	3e-45
Kukri_c66502_108	IWB47310	2B	137.9	2B	690033160	99.01	101	2e-43
Kukri_rep_c108243_143	IWB49323	2B	137.9	2B	683028811	100	71	2e-28
RAC875_c23538_1517	IWB55526	2B	137.9	2B	683046097	99.01	101	2e-43
RAC875_c8197_810	IWB60670	2B	137.9	2D	571077641	100	82	1e-34
BS00010012_51	IWB6150	2B	137.9	2D	572335747	98.06	103	2e-42
RAC875_rep_c108548_163	IWB61802	2B	137.9	2A	709837034	99.01	101	2e-43
Tdurum_contig55699_246	IWB72468	2B	137.9	2D	571080204	99.01	101	2e-43
BS00023124_51	IWB7433	2B	137.9	2B	683046880	99.01	101	2e-43
BS00035276_51	IWB8007	2B	137.9	2D	572335944	100	73	1e-29
BS00064318_51	IWB9247	2B	137.9	2B	686049316	98.02	101	7e-42
BS00064322_51	IWB9248	2B	137.9	2B	686049051	100	101	3e-45
BS00067094_51	IWB9954	2B	137.9	4D	21153109	100	101	3e-45
IACX8096	IWB36270	2B	139.2	2B	691780964	100	201	2e-100
RAC875_c17658_1419	IWB54520	2B	139.2	2B	693845339	99.01	101	2e-43
wsnp_JD_c6010_7167159	IWA6122	2B	140.3	2D	576280384	96.52	201	3e-89
Excalibur_rep_c111801_55	IWB30560	2B	140.3	2D	576280504	98.94	94	1e-39
RAC875_c76186_353	IWB60406	2B	140.3	2B	693315277	97.09	103	1e-40
Excalibur_c2819_1773	IWB24675	2B	142.3	2B	698964498	99.01	101	2e-43
IAAV3067	IWB34658	2B	142.3	2B	699173366	100	89	3e-38
BobWhite_c4831_490	IWB3648	2B	142.3	2D	580194188	99.01	101	2e-43
Kukri_c834_259	IWB47959	2B	142.3	2B	698968708	100	101	3e-45
RAC875_c17459_566	IWB54478	2B	142.3	2D	580238679	94	100	1e-34
RAC875_c4465_549	IWB58060	2B	142.3	2B	699108786	99.01	101	2e-43
BS00021713_51	IWB6732	2B	142.3	2B	698208660	100	101	3e-45
Excalibur_c47745_63	IWB26896	2B	142.8	2B	704721642	99.01	101	2e-43
BS00101402_51	IWB12174	2B	144.1	2B	707987595	99.01	101	2e-43
wsnp_Ex_rep_c102127_87360034	IWA5051	2B	144.8	2B	709821789	98.41	126	8e-55
wsnp_Ra_c54256_57628288	IWA7996	2B	144.8	2B	706730343	100	201	2e-100
JD_c3211_962	IWB37344	2B	144.8	2B	706732307	100	101	3e-45
Tdurum_contig21896_174	IWB68952	2B	144.8	2B	709423638	98.02	101	3e-41
Tdurum_contig12879_320	IWB67765	2B	146	2B	712601530	97.03	101	1e-39
wsnp_Ex_c28627_37743031	IWA3176	2B	146.8	2B	715029393	99.5	201	1e-98
wsnp_Ku_c15498_24122936	IWA6561	2B	146.8	2B	715031553	98.51	201	5e-97
Excalibur_c27629_473	IWB24602	2B	146.8	2B	714132897	100	90	4e-39
BobWhite_c32938_366	IWB2594	2B	146.8	2B	715599457	99.01	101	2e-43
Excalibur_c80601_83	IWB28963	2B	146.8	2B	713675765	98.02	101	7e-42
BobWhite_c4704_304	IWB3551	2B	146.8	2D	590071562	97.03	101	3e-40
Tdurum_contig72054_210	IWB73210	2B	146.8	2B	716593481	99.01	101	2e-43
Tdurum_contig72054_94	IWB73211	2B	146.8	2B	716593365	100	101	3e-45
BS00047070_51	IWB8449	2B	146.8	2B	714779901	99.01	101	2e-43
BS00047073_51	IWB8450	2B	146.8	2B	714779819	100	101	3e-45
BS00064740_51	IWB9359	2B	146.8	2B	715310733	100	101	3e-45
Tdurum_contig42046_597	IWB70768	2B	147.4	2B	719801659	99.01	101	2e-43
IACX5941	IWB36072	2B	148.6	2D	588793384	92.5	120	1e-40
RAC875_c81984_707	IWB60671	2B	148.6	2B	719800866	96.04	101	2e-38
Tdurum_contig42046_1390	IWB70765	2B	148.6	2B	719800866	97.03	101	3e-40
Tdurum_contig64795_432	IWB73002	2B	148.6	2B	722620618	99.01	101	2e-43
Tdurum_contig78534_314	IWB73441	2B	148.6	2B	720807543	100	101	3e-45
BS00036456_51	IWB8054	2B	148.6	2D	592788886	99.01	101	2e-43
Tdurum_contig45468_674	IWB71610	2B	150.3	2B	727220023	99.01	101	2e-43
BS00022674_51	IWB7207	2B	150.3	2B	726547835	100	101	3e-45
BS00065471_51	IWB9560	2B	150.3	2B	731536167	99.01	101	2e-43
wsnp_CAP7_c317_172502	IWA1076	2B	150.5	2B	731000103	99.5	201	1e-98
Excalibur_c14201_111	IWB22381	2B	151	2B	730563969	100	63	5e-24
Kukri_rep_c68903_159	IWB49827	2B	151	2B	730188244	100	73	1e-29
Kukri_rep_c68903_301	IWB49828	2B	151	2B	730188509	100	101	3e-45
Kukri_rep_c68903_708	IWB49829	2B	151	2B	730189340	100	83	3e-35
BS00004224_51	IWB5957	2B	151	2B	730563070	100	88	6e-38
RAC875_rep_c106542_272	IWB61604	2B	151	2B	731311088	100	66	1e-25
Tdurum_contig28113_579	IWB69431	2B	151	2B	730189892	100	76	3e-31
BS00022713_51	IWB7223	2B	151	2B	730191832	99.01	101	2e-43
Tdurum_contig82393_581	IWB73567	2B	151	2B	730562711	98.02	101	7e-42
BS00065327_51	IWB9514	2B	151.4	2B	731481845	98.04	102	7e-42
BS00110721_51	IWB12591	2B	151.7	2B	734050270	100	101	3e-45
Kukri_c57014_168	IWB46631	2B	153	2B	734127015	99.01	101	2e-43
Kukri_c30659_91	IWB43878	2B	153.3	2B	740315198	99.01	101	2e-43
wsnp_RFL_Contig2914_2757372	IWA8406	2B	153.4	2D	607673388	100	101	3e-45
Tdurum_contig60205_644	IWB72717	2B	153.4	2A	739712795	99.01	101	2e-43
Tdurum_contig77036_338	IWB73407	2B	153.4	2B	740218322	99.01	101	2e-43
Tdurum_contig93103_284	IWB73846	2B	153.4	2B	737689251	100	101	3e-45
BS00081109_51	IWB11166	2B	153.8	2B	734453522	99.01	101	2e-43
Kukri_c38497_174	IWB44804	2B	153.8	2B	736790773	100	101	3e-45
BobWhite_c852_630	IWB4485	2B	153.8	2B	741445454	99.01	101	2e-43
BobWhite_c13295_407	IWB479	2B	153.8	2B	741860533	99.01	101	2e-43
RAC875_rep_c72155_1009	IWB62841	2B	153.8	2D	605713607	97.03	101	1e-39
RFL_Contig2914_1097	IWB64126	2B	153.8	2D	607675146	99.01	101	2e-43
RFL_Contig4499_1145	IWB64695	2B	153.8	2B	738682100	100	101	3e-45
BS00012382_51	IWB6557	2B	153.8	2B	740314898	100	101	3e-45
BS00022374_51	IWB7050	2B	153.8	2B	745512438	100	101	3e-45
BobWhite_c15453_1010	IWB785	2B	153.8	2B	740801904	99.01	101	2e-43
BobWhite_c15453_678	IWB786	2B	153.8	2B	740802332	100	101	3e-45
BS00035380_51	IWB8011	2B	153.8	2B	740313513	100	101	3e-45
BS00035959_51	IWB8034	2B	153.8	2B	738682491	99.01	101	2e-43
Excalibur_c17745_493	IWB23010	2B	155.5	2B	743693951	99.01	101	2e-43
Excalibur_c1940_359	IWB23306	2B	156.6	2B	745579646	99.01	101	2e-43
Excalibur_c37753_655	IWB25868	2B	156.6	2B	743745992	100	83	3e-35
RAC875_c1734_703	IWB54450	2B	156.6	2B	745580682	99.01	101	2e-43
RAC875_c26697_589	IWB55966	2B	156.6	2B	743736791	100	101	3e-45
BobWhite_c7050_564	IWB4272	2B	158.3	2B	746101779	99.01	101	2e-43
BobWhite_c7050_792	IWB4273	2B	158.3	2B	746101551	100	101	3e-45
Tdurum_contig9214_279	IWB73784	2B	158.3	2B	746101679	99.01	101	2e-43
BS00043338_51	IWB8338	2B	158.3	2B	747125441	98.02	101	7e-42
wsnp_Ku_c48694_54811423	IWA7113	2B	161.5	2B	751261494	99.5	201	3e-99
BS00076000_51	IWB10845	2B	161.5	2B	751322494	99.01	101	2e-43
BS00076003_51	IWB10846	2B	161.5	2B	751322446	99.01	101	2e-43
Excalibur_c42146_338	IWB26301	2B	161.5	2B	752485206	100	67	3e-26
IACX3246	IWB35911	2B	161.5	2B	752785069	100	120	1e-55
BobWhite_c7773_283	IWB4383	2B	161.5	2B	750145475	98.53	68	4e-25
BS00023902_51	IWB7514	2B	161.5	2B	752491766	99.01	101	2e-43
BS00067828_51	IWB10162	2B	163.1	2B	754661130	100	101	3e-45
Tdurum_contig49532_53	IWB71976	2B	165.7	2B	760949674	99.01	101	2e-43
Ra_c69149_345	IWB52447	2B	165.9	2B	761280239	99.01	101	2e-43
IACX8298	IWB36286	2B	166.3	2B	764074107	100	127	2e-59
BobWhite_c23950_145	IWB1769	2B	169.3	2B	767021678	97.03	101	1e-40
Excalibur_c7051_1027	IWB28561	2B	169.3	2D	624553595	100	101	3e-45
Excalibur_c7051_537	IWB28564	2B	169.3	2D	624553105	100	101	3e-45
Excalibur_c7051_590	IWB28565	2B	169.3	2D	624553158	100	101	3e-45
Kukri_c27631_1329	IWB43464	2B	169.3	2B	767018109	100	101	3e-45
RFL_Contig3713_538	IWB64463	2B	169.3	2B	767021545	100	101	3e-45
BS00051965_51	IWB8607	2B	169.3	2B	767021859	100	96	2e-42
Ex_c7795_2122	IWB21324	2B	169.5	2B	767375141	98.78	82	2e-32
BobWhite_c33464_133	IWB2628	2B	169.5	2B	767176615	99.01	101	6e-43
IACX8386	IWB36295	2B	169.5	#N/A	#N/A	#N/A	#N/A	#N/A
Kukri_c96357_134	IWB48440	2B	169.5	2B	769080251	98.65	74	6e-28
RAC875_c24205_110	IWB55615	2B	169.5	#N/A	#N/A	#N/A	#N/A	#N/A
RAC875_c37540_565	IWB57294	2B	169.5	2B	769072314	98.99	99	2e-42
RAC875_c37540_583	IWB57295	2B	169.5	2B	769072296	98.02	101	3e-41
IAAV1502	IWB34394	2B	170.9	2B	769949801	100	130	6e-61
Kukri_rep_c71154_1562	IWB50096	2B	171.7	2A	758397191	100	101	3e-45
Tdurum_contig12159_468	IWB67472	2B	171.7	2B	772053292	99.01	101	2e-43
wsnp_Ex_c10555_17235832	IWA1348	2B	172	2A	760565727	99.5	201	1e-98
Kukri_c657_1514	IWB47254	2B	172	2B	773141268	99	100	6e-43
Tdurum_contig234_843	IWB69000	2B	172	2D	629849085	95.05	101	8e-37
Excalibur_c56550_425	IWB27660	2B	172.4	2B	775169690	99.01	101	2e-43
Excalibur_c56550_71	IWB27661	2B	172.4	2B	775169337	96.04	101	2e-38
Kukri_c10869_1366	IWB40455	2B	172.4	2B	775169624	99.01	101	2e-43
wsnp_Ex_c3695_6740339	IWA3596	2B	173.4	2A	759830536	98.8	167	1e-78
BS00027613_51	IWB7660	2B	174.6	1B	51991253	100	101	3e-45
Tdurum_contig19520_395	IWB68812	2B	174.8	2B	779853065	100	101	3e-45
Tdurum_contig9071_215	IWB73759	2B	175	2B	777384121	100	101	3e-45
Excalibur_c49875_479	IWB27094	2B	175.2	2D	634877305	99.01	101	2e-43
Excalibur_c20417_743	IWB23478	2B	175.6	2B	780869154	100	101	3e-45
BobWhite_c12911_788	IWB429	2B	175.6	2D	651278727	97.03	101	3e-40
Tdurum_contig10048_61	IWB66207	2B	175.6	2B	779341223	99.01	101	2e-43
Tdurum_contig52627_726	IWB72278	2B	175.6	2A	777515611	97.89	95	2e-38
tplb0030f06_593	IWB74399	2B	175.6	2D	651415822	98.84	86	3e-35
CAP7_c16_300	IWB13829	2B	175.7	2B	777385135	96.04	101	2e-38
BobWhite_c21827_104	IWB1524	2B	175.7	2D	634876054	97.03	101	1e-39
Ku_c67680_195	IWB39800	2B	175.7	2B	777513894	98.02	101	7e-42
BS00074665_51	IWB10754	2B	180.1	1B	51990856	99.01	101	2e-43
BS00083329_51	IWB11295	2B	180.1	2B	781830297	100	101	3e-45
Excalibur_c23857_594	IWB24056	2B	180.1	2B	780788068	99.01	101	2e-43
Kukri_c21135_1071	IWB42438	2B	180.1	Un	31215611	100	101	3e-45
BobWhite_c928_311	IWB4592	2B	180.1	2B	784553512	98.59	71	8e-27
RAC875_c7735_338	IWB60460	2B	180.1	2B	782154165	99.01	101	2e-43
Tdurum_contig31419_359	IWB70244	2B	180.1	2B	780873075	99.01	101	2e-43
BS00039187_51	IWB8157	2B	180.1	2B	781584349	100	101	3e-45
wsnp_Ex_c31064_39902843	IWA3315	2B	181.6	2B	789867336	100	192	2e-95
BS00072839_51	IWB10623	2B	181.6	2B	789605589	99.01	101	2e-43
IAAV1798	IWB34450	2B	181.6	2B	788658824	100	81	9e-34
Jagger_c10188_98	IWB36409	2B	181.6	2B	786105407	99.01	101	2e-43
Kukri_c60352_344	IWB46858	2B	181.6	2B	786232039	100	101	3e-45
BS00007384_51	IWB6010	2B	181.6	2B	787819648	99.01	101	2e-43
RAC875_c999_612	IWB61303	2B	181.6	2B	788797409	99.01	101	2e-43
BS00025106_51	IWB7569	2B	181.6	2B	787742888	98.02	101	7e-42
wsnp_Ex_rep_c70525_69448648	IWA5694	2B	182.7	2B	797327274	99.22	128	4e-58
CAP12_c3254_366	IWB13362	2B	182.7	2B	789965388	98.02	101	2e-42
Excalibur_c2311_114	IWB23909	2B	182.7	2A	765707510	100	101	3e-45
Excalibur_c2311_1563	IWB23911	2B	182.7	2D	640215463	100	101	3e-45
Excalibur_c3635_3192	IWB25706	2B	182.7	2D	638133955	100	101	3e-45
Kukri_c900_1376	IWB48200	2B	182.7	2B	796806875	98.57	70	3e-26
RAC875_c16993_196	IWB54389	2B	182.7	2B	786106004	100	101	3e-45
BS00004413_51	IWB5978	2B	182.7	2B	784551415	99.01	101	2e-43
Kukri_c52900_280	IWB46300	2B	183.1	2B	790228722	100	101	3e-45
RAC875_c29056_405	IWB56271	2B	183.1	2D	644332429	99.01	101	2e-43
Tdurum_contig20987_1271	IWB68909	2B	183.1	3B	402912941	99.01	101	2e-43
Tdurum_contig20987_432	IWB68911	2B	183.1	6B	492506599	99.01	101	2e-43
BS00065302_51	IWB9505	2B	183.1	2B	790274489	99.01	101	2e-43
wsnp_Ex_c16074_24502385	IWA2094	2B	183.6	2B	791704344	100	201	2e-100
BS00083998_51	IWB11333	2B	183.6	2B	790751801	99.01	101	2e-43
RAC875_c17798_66	IWB54548	2B	183.6	2B	791704550	99.01	101	2e-43
Excalibur_c58231_273	IWB27789	2B	185.3	2B	800121319	99.01	101	2e-43
IAAV8570	IWB35499	2B	185.3	2D	645828908	99.26	135	5e-62
tplb0042a21_1091	IWB74736	2B	185.7	2B	791479526	100	101	3e-45
Kukri_c43178_438	IWB45312	2B	185.8	2D	641309430	97.03	101	1e-39
Tdurum_contig41912_402	IWB70683	2B	185.8	2B	777650274	97.1	69	5e-24
BS00026037_51	IWB7606	2B	185.8	2B	793151228	99.01	101	2e-43
RAC875_c3259_673	IWB56746	2B	187.6	2D	640211814	98.44	64	6e-23
Tdurum_contig10181_95	IWB66320	2B	187.6	2A	764659213	100	95	7e-42
RAC875_c17591_2085	IWB54507	2B	187.7	2D	638862646	98.02	101	7e-42
IAAV8632	IWB35507	2B	188.1	Un	249447079	100	181	2e-89
BS00019095_51	IWB6663	2B	188.4	Un	124958942	99.01	101	2e-43
wsnp_JD_c7305_8404286	IWA6164	2B	188.6	#N/A	#N/A	#N/A	#N/A	#N/A
RAC875_c15861_191	IWB54170	2B	188.6	2B	798225813	99.01	101	2e-43
RAC875_c44901_118	IWB58090	2B	188.6	2A	764311527	97.98	99	1e-40
Excalibur_c1999_1298	IWB23407	2B	189	2A	762508036	99.01	101	2e-43
Kukri_rep_c68139_172	IWB49759	2B	189	Un	124834712	99.01	101	2e-43
RAC875_c7602_2109	IWB60399	2B	189	2B	795066126	99.01	101	2e-43
Excalibur_c25781_232	IWB24368	2B	189.3	2D	635951838	97.03	101	3e-40
IACX7581	IWB36210	2B	189.3	2D	635950364	97.64	127	2e-54
Kukri_rep_c110277_268	IWB49441	2B	189.8	2A	762506629	99.01	101	2e-43
BS00054751_51	IWB8650	2B	189.8	2B	795051015	99.01	101	2e-43
Kukri_c1947_70	IWB42141	2B	193.6	2D	636600968	100	101	3e-45
BobWhite_c13752_400	IWB543	2B	195.8	Un	124809536	99.01	101	2e-43
CAP7_c1467_220	IWB13817	3A	0	3A	1381332	100	101	3e-45
Tdurum_contig76679_307	IWB73394	3A	0	3A	1325954	100	101	3e-45
[truncated: 4,495 more rows]
